# Supplementary material for: In situ hydrolysis of a carbophosphazene ligand leads to one-dimensional lanthanide coordination polymers. Synthesis, structure and dynamic magnetic studies
Source: Royal Society of Chemistry journal article supplement (doi:10.1039/d4dt00582a), 2024-01-01
Supplement: d4dt00582a1.pdf [file d4dt00582a1.pdf]

## Electronic Supporting Information

### ***In situ* Hydrolysis of a Carbophosphazene Ligand Leads to One-Dimensional Lanthanide Coordination Polymers. Synthesis, Structure and Dynamic Magnetic Studies.**

Naushad Ahmed,<sup>a ‡</sup> Prem Prakash Sahu,<sup>b, §</sup> Amit Chakraborty,<sup>a</sup> Jessica Flores Gonzalez,<sup>c §</sup> Junaid Ali,<sup>a</sup> Pankaj Kalita,<sup>a</sup> Fabrice Pointillart,<sup>\* c</sup> Saurabh Kumar Singh<sup>\* b</sup> Vadapalli Chandrasekhar <sup>\* a, d</sup>

<sup>a</sup> Tata Institute of Fundamental Research Hyderabad, Gopanpally, Hyderabad-500046, Telangana, India

<sup>b</sup> Department of Chemistry, Indian Institute of Technology Hyderabad, Kandi, Telangana-502285, India

<sup>c</sup> Univ Rennes, CNRS, ISCR (Institut des Sciences Chimiques de Rennes) - UMR 6226, 35000 Rennes, France

<sup>d</sup> Department of Chemistry, Indian Institute of Technology Kanpur, Kanpur-208016, India

<sup>‡</sup> Current address: Departments of Chemistry, Texas A&M University, College Station, Texas 77842, United State

<sup>§</sup> Authors contributed equally

**Scheme S1.** General synthetic route adopted to isolate the tetrameric Cu<sup>II</sup> ensemble. <sup>1</sup>

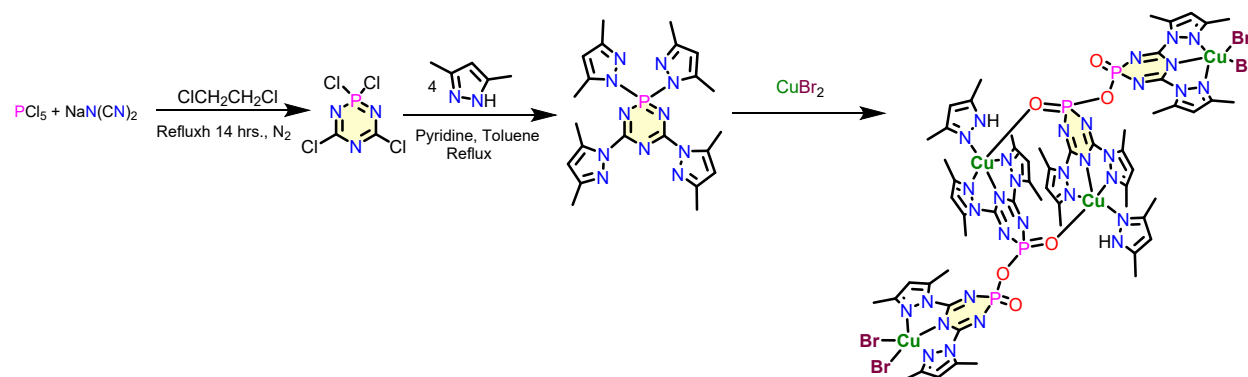

**Table S1.** Crystallographic and hydrogen bond parameters for **1-4**

|                                                | <b>1</b>                                                                           | <b>2</b>                                                                            | <b>3</b>                                                                           | <b>4</b>                                                                           |            |          |
|------------------------------------------------|------------------------------------------------------------------------------------|-------------------------------------------------------------------------------------|------------------------------------------------------------------------------------|------------------------------------------------------------------------------------|------------|----------|
| Formula                                        | C <sub>14</sub> H <sub>40</sub> ClGdN <sub>12</sub> O <sub>14</sub> P <sub>2</sub> | C <sub>15</sub> H <sub>42</sub> ClN <sub>12</sub> O <sub>14</sub> P <sub>2</sub> Tb | C <sub>15</sub> H <sub>42</sub> ClDyN <sub>12</sub> O <sub>14</sub> P <sub>2</sub> | C <sub>15</sub> H <sub>42</sub> ClErN <sub>12</sub> O <sub>14</sub> P <sub>2</sub> |            |          |
| Size [mm]                                      | 0.220 × 0.210 × 0.190                                                              | 0.240 × 0.200 × 0.140                                                               | 0.240 × 0.210 × 0.190                                                              | 0.260 × 0.210 × 0.170                                                              |            |          |
| System                                         | Monoclinic                                                                         | Monoclinic                                                                          | Monoclinic                                                                         | Monoclinic                                                                         |            |          |
| Space group                                    | P2 <sub>1</sub> /n                                                                 | P2 <sub>1</sub> /n                                                                  | P2 <sub>1</sub> /n                                                                 | P2 <sub>1</sub> /n                                                                 |            |          |
| <i>a</i> [Å]                                   | 12.9642(6)                                                                         | 12.9417(3)                                                                          | 12.9515(4)                                                                         | 12.9252(3)                                                                         |            |          |
| <i>b</i> [Å]                                   | 13.9446(8)                                                                         | 13.8877(4)                                                                          | 13.8286(5)                                                                         | 13.7997(3)                                                                         |            |          |
| <i>c</i> [Å]                                   | 18.4472(12)                                                                        | 18.2069(5)                                                                          | 18.1752(7)                                                                         | 18.2660(5)                                                                         |            |          |
| <i>α</i> [°]                                   | 90                                                                                 | 90                                                                                  | 90                                                                                 | 90                                                                                 |            |          |
| <i>β</i> [°]                                   | 96.725(5)                                                                          | 97.507(2)                                                                           | 97.685(3)                                                                          | 97.052(2)                                                                          |            |          |
| <i>γ</i> [°]                                   | 90                                                                                 | 90                                                                                  | 90                                                                                 | 90                                                                                 |            |          |
| <i>V</i> [Å <sup>3</sup> ]                     | 3312.0(3)                                                                          | 3244.29(15)                                                                         | 3226.0(2)                                                                          | 3233.35(14)                                                                        |            |          |
| <i>Z</i>                                       | 4                                                                                  | 4                                                                                   | 4                                                                                  | 4                                                                                  |            |          |
| <i>ρ</i> <sub>calcd</sub> [g/cm <sup>3</sup> ] | 1.715                                                                              | 1.783                                                                               | 1.801                                                                              | 1.806                                                                              |            |          |
| 2 $\theta$ <sub>max</sub>                      | 49.998                                                                             | 59.226                                                                              | 52.738                                                                             | 57.838                                                                             |            |          |
| Radiation                                      | Mo K $\alpha$                                                                      | Mo K $\alpha$                                                                       | MoK $\alpha$                                                                       | Mo K $\alpha$                                                                      |            |          |
| $\lambda$ [Å]                                  | 0.71073                                                                            | 0.71073                                                                             | 0.71073                                                                            | 0.71073                                                                            |            |          |
| <i>T</i> [K]                                   | 293(2)                                                                             | 293(2)                                                                              | 293(2)                                                                             | 293(2)                                                                             |            |          |
| Reflns                                         | 33646                                                                              | 41564                                                                               | 38110                                                                              | 29965                                                                              |            |          |
| Ind. Reflns                                    | 5770                                                                               | 7739                                                                                | 6581                                                                               | 7610                                                                               |            |          |
| reflns with <i>I</i> > 2 $\sigma$ ( <i>I</i> ) | 16297                                                                              | 5617                                                                                | 5209                                                                               | 5857                                                                               |            |          |
| <i>R</i> <i>I</i>                              | 0.0485                                                                             | 0.0351                                                                              | 0.0591                                                                             | 0.0404                                                                             |            |          |
| <i>wR</i> <i>2</i>                             | 0.1173                                                                             | 0.0801                                                                              | 0.1624                                                                             | 0.1055                                                                             |            |          |
| Hydrogen-bond geometry (Å, °) for <b>1-4</b>   |                                                                                    |                                                                                     |                                                                                    |                                                                                    |            |          |
| Complex                                        | Interaction                                                                        | Type                                                                                | dD–H (Å)                                                                           | H···A (Å)                                                                          | dD···A (Å) | <DHA (°) |
| <b>1</b>                                       | N1–H1·····O5                                                                       | Intra                                                                               | 0.86                                                                               | 2.21                                                                               | 2.978(7)   | 148      |
|                                                | O1–H1A·····Cl1                                                                     |                                                                                     | 0.85                                                                               | 2.18                                                                               | 2.990(7)   | 160      |
|                                                | O1W–H1WB·····O3                                                                    | Intra                                                                               | 0.93                                                                               | 1.93                                                                               | 2.725(7)   | 143      |
|                                                | N7–H7·····O3                                                                       | Intra                                                                               | 0.86                                                                               | 2.16                                                                               | 2.860(7)   | 138      |
| <b>2</b>                                       | O1–H1·····Cl1                                                                      |                                                                                     | 0.87                                                                               | 2.21                                                                               | 3.031(3)   | 157      |
|                                                | O1W–H1WA·····O3                                                                    | Intra                                                                               | 0.85                                                                               | 1.84                                                                               | 2.685(3)   | 169      |
|                                                | N1–H1A·····O5                                                                      | Intra                                                                               | 0.86                                                                               | 2.17                                                                               | 2.932(4)   | 148      |
|                                                | O1W–H1WB·····O12                                                                   |                                                                                     | 0.95                                                                               | 1.76                                                                               | 2.699(4)   | 169      |
|                                                | N8–H8·····O3                                                                       | Intra                                                                               | 0.86                                                                               | 2.14                                                                               | 2.839(4)   | 137      |
|                                                | O12–H12·····Cl1                                                                    |                                                                                     | 0.82                                                                               | 2.17                                                                               | 2.976(4)   | 166      |
| O14–H14·····N3                                 |                                                                                    | 0.82                                                                                | 2.02                                                                               | 2.817(5)                                                                           | 165        |          |
| <b>3</b>                                       | O1–H1·····Cl1                                                                      |                                                                                     | 0.82                                                                               | 2.28                                                                               | 3.024(7)   | 150      |
|                                                | O1W–H1WA·····O5                                                                    | Intra                                                                               | 0.85                                                                               | 1.90                                                                               | 2.695(9)   | 155      |
|                                                | O1S–H1S·····N8                                                                     |                                                                                     | 0.84                                                                               | 2.00                                                                               | 2.800(11)  | 160      |
|                                                | N3–H3·····O5                                                                       | Intra                                                                               | 0.88                                                                               | 2.14                                                                               | 2.847(9)   | 137      |
|                                                | N6–H6·····O3                                                                       | Intra                                                                               | 0.88                                                                               | 2.14                                                                               | 2.928(9)   | 148      |
| <b>4</b>                                       | O1–H1·····Cl1                                                                      |                                                                                     | 0.82                                                                               | 2.27                                                                               | 3.037(3)   | 156      |
|                                                | O1W–H1WA·····O3                                                                    | Intra                                                                               | 0.85                                                                               | 1.84                                                                               | 2.677(4)   | 169      |
|                                                | O1W–H1WB·····O14                                                                   |                                                                                     | 0.85                                                                               | 1.89                                                                               | 2.712(5)   | 163      |
|                                                | N3–H3·····O3S                                                                      |                                                                                     | 0.86                                                                               | 2.03                                                                               | 2.824(5)   | 153      |
|                                                | O3S–H3S·····Cl1                                                                    |                                                                                     | 0.82                                                                               | 2.27                                                                               | 3.094(4)   | 179      |
|                                                | N6–H6·····O3                                                                       | Intra                                                                               | 0.86                                                                               | 2.16                                                                               | 2.850(5)   | 137      |
| O14–H14·····Cl1                                |                                                                                    | 0.82                                                                                | 2.15                                                                               | 2.961(6)                                                                           | 170        |          |

**Table S2.** Continuous Shape Measurement (CShM) analysis for **1-4**

|          | <b>1</b>     | <b>2</b>     | <b>3</b>     | <b>4</b>     |
|----------|--------------|--------------|--------------|--------------|
| EP-9     | 36.221       | 35.843       | 35.691       | 36.116       |
| OPY-9    | 21.303       | 21.154       | 21.196       | 21.313       |
| HBPY-9   | 16.678       | 17.076       | 17.002       | 17.303       |
| JTC-9    | 16.065       | 15.819       | 15.671       | 15.975       |
| JCCU-9   | 11.538       | 11.072       | 11.014       | 10.942       |
| CCU-9    | 9.696        | 9.503        | 9.422        | 9.821        |
| JCSAPR-9 | 3.108        | 2.407        | 2.401        | 2.281        |
| CSAPR-9  | <b>2.252</b> | 1.742        | 1.719        | 1.648        |
| JTCTPR-9 | 4.049        | 3.804        | 3.825        | 3.487        |
| TCTPR-9  | 2.701        | 2.512        | 2.470        | 2.334        |
| JTDIC-9  | 12.941       | 12.814       | 12.700       | 12.797       |
| HH-9     | 8.351        | 8.760        | 8.695        | 9.135        |
| MFF-9    | <b>1.655</b> | <b>1.357</b> | <b>1.339</b> | <b>1.315</b> |

**EP-9**,  $D_{9h}$  Enneagon, **OPY-9** $C_{8v}$  Octagonal pyramid, **HBPY-9** $D_{7h}$  Heptagonal bipyramid, **JTC-9** $C_{3v}$  Johnson triangular cupola J3, **JCCU-9** $C_{4v}$  Capped cube J8, **CCU-9** $C_{4v}$  Spherical-relaxed capped cube, **JCSAPR-9** $C_{4v}$  Capped square antiprism J10, **CSAPR-9** $C_{4v}$  Spherical capped square antiprism, **JTCTPR-9** $D_{3h}$  Tricapped trigonal prism J51, **TCTPR-9** $D_{3h}$  Spherical tricapped trigonal prism, **JTDIC-9** $C_{3v}$  Tridiminished icosahedron J63, **HH-9**  $C_{2v}$  Hula-hoop **MFF-9** $C_s$  Muffin

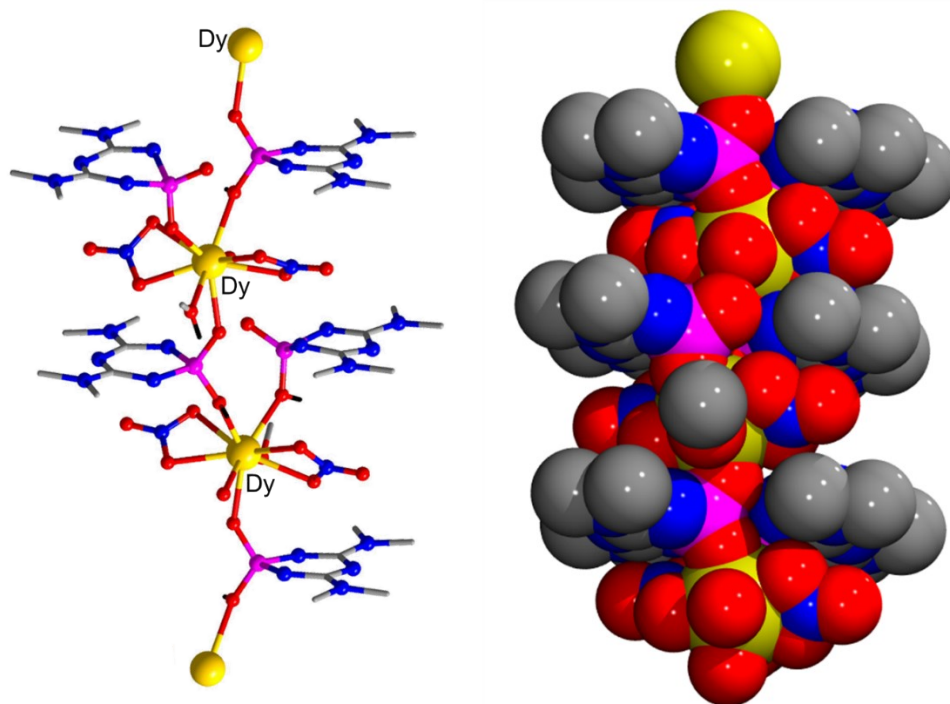

**Figure S1.** 1D extended structure of representative coordination polymer **3** and its space filling diagram.

**Table S3.** Selected bond lengths and bond angle parameters for **1-4**.

| <b>Bond Length (Å)</b>            | <b>1</b> | <b>2</b>   | <b>3</b> | <b>4</b>   |
|-----------------------------------|----------|------------|----------|------------|
| Ln1-O1                            | 2.462(5) | 2.448(3)   | 2.437(7) | 2.405(3)   |
| Ln1-O2                            | 2.327(5) | 2.296(2)   | 2.291(7) | 2.264(2)   |
| Ln1-O4                            | 2.384(5) | 2.370(2)   | 2.357(7) | 2.338(2)   |
| Ln1-O5                            | 2.446(4) | 2.432(2)   | 2.421(6) | 2.417(2)   |
| Ln1-O6                            | 2.532(6) | 2.546(3)   | 2.426(7) | 2.401(3)   |
| Ln1-O7                            | 2.487(5) | 2.439(3)   | 2.534(8) | 2.522(3)   |
| Ln1-O9                            | 2.488(5) | 2.474(3)   | 2.468(7) | 2.482(3)   |
| Ln1-O10                           | 2.542(6) | 2.515(3)   | 2.494(7) | 2.438(3)   |
| Ln1-O1W                           | 2.420(5) | 2.370(2)   | 2.358(7) | 2.331(3)   |
| <b>Bond Angle (°)</b>             |          |            |          |            |
| P1-O2-Ln1                         | 139.1(3) | 138.07(14) | 138.1(3) | 137.97(15) |
| P2-O4-Ln1                         | 155.8(3) | 154.37(13) | 154.7(4) | 154.49(17) |
| P2-O5-Ln2                         | 140.7(3) | 139.41(13) | 139.0(3) | 139.63(16) |
| <b>Intermetallic Distance (Å)</b> |          |            |          |            |
| Ln1-Ln2                           | 7.172    | 7.136      | 7.111    | 7.094      |

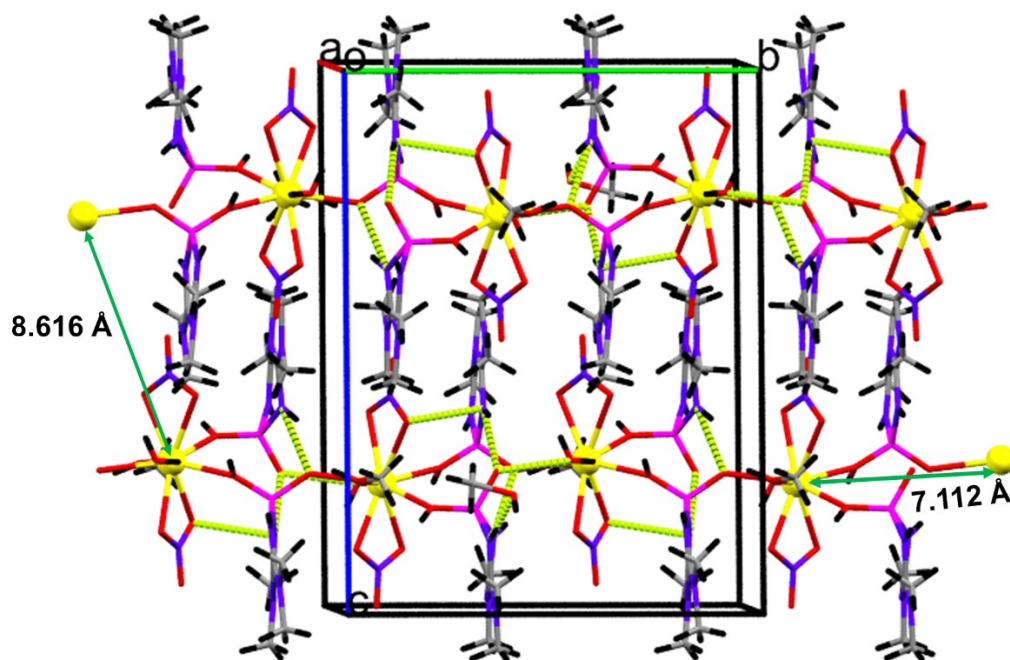

**Figure S2.** Packing structure of representative complex 3 along a-axis. The fragmented light green bonds represent hydrogen bonding.

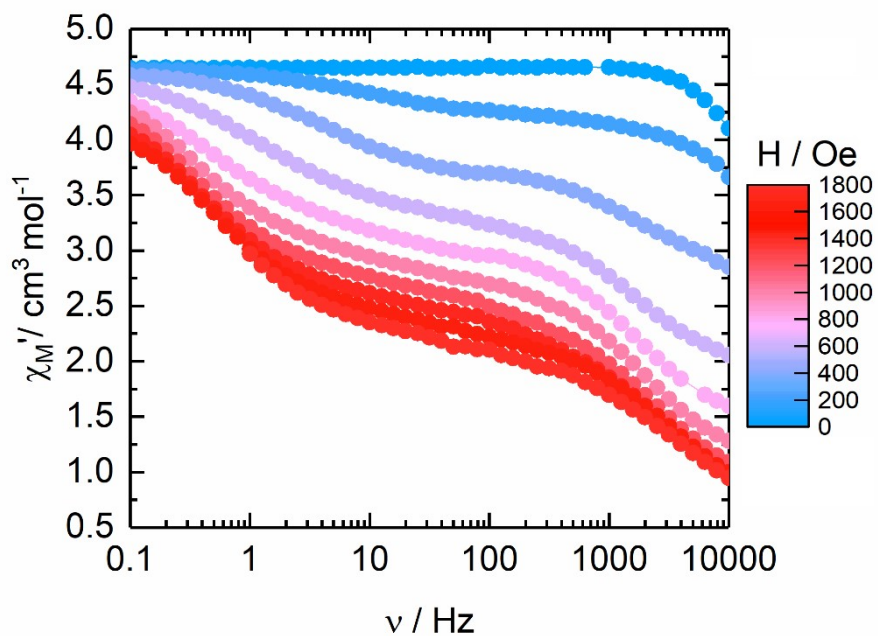

**Figure S3.** Field dependence of the in-phase component ( $\chi_M'$ ) of the magnetic susceptibility at 2 K for 3

**Extended Debye model used for two relaxation contributions (Eq. S1).**

$$\chi_M' = \chi_S + (\chi_T - \chi_S) \left\{ \frac{\beta \left[ 1 + (\omega\tau_1)^{1-\alpha_1} \sin\left(\frac{\pi}{2}\alpha_1\right) \right]}{1 + 2(\omega\tau_1)^{1-\alpha_1} \sin\left(\frac{\pi}{2}\alpha_1\right) + (\omega\tau_1)^{2(1-\alpha_1)}} + \frac{(1-\beta) \left[ 1 + (\omega\tau_2)^{1-\alpha_2} \sin\left(\frac{\pi}{2}\alpha_2\right) \right]}{1 + 2(\omega\tau_2)^{1-\alpha_2} \sin\left(\frac{\pi}{2}\alpha_2\right) + (\omega\tau_2)^{2(1-\alpha_2)}} \right\}$$

$$\chi_M'' = (\chi_T - \chi_S) \left\{ \frac{\beta \left[ (\omega\tau_1)^{1-\alpha_1} \cos\left(\frac{\pi}{2}\alpha_1\right) \right]}{1 + 2(\omega\tau_1)^{1-\alpha_1} \sin\left(\frac{\pi}{2}\alpha_1\right) + (\omega\tau_1)^{2(1-\alpha_1)}} + \frac{(1-\beta) \left[ (\omega\tau_2)^{1-\alpha_2} \cos\left(\frac{\pi}{2}\alpha_2\right) \right]}{1 + 2(\omega\tau_2)^{1-\alpha_2} \sin\left(\frac{\pi}{2}\alpha_2\right) + (\omega\tau_2)^{2(1-\alpha_2)}} \right\}$$

With  $\chi_T$  the isothermal susceptibility,  $\chi_S$  the adiabatic susceptibility,  $\tau$  the relaxation time and  $\alpha$  an empiric parameter which describe the distribution of the relaxation time. For SMM with only one relaxing object  $\alpha$  is close to zero. The extended Debye model was applied to fit simultaneously the experimental variations of  $\chi_M'$  and  $\chi_M''$  with the frequency  $\nu$  of the oscillating field ( $\omega = 2\pi\nu$ ). The best fitted parameters  $\tau_1$ ,  $\alpha_1$ ,  $\chi_{1T}$ ,  $\chi_{1S}$ ,  $\tau_2$ ,  $\alpha_2$ ,  $\chi_{2T}$  and  $\chi_{2S}$  are listed in Tables S4 and S11 with the coefficient of determination  $R^2$ .  $\tau_1$ ,  $\alpha_1$ ,  $\chi_{1T}$ ,  $\chi_{1S}$  are parameters for the high frequency contribution while  $\tau_2$ ,  $\alpha_2$ ,  $\chi_{2T}$  and  $\chi_{2S}$  are for the low frequency contribution.

**Extended Debye model used for a single relaxation contribution (Eq. S2).**

$$\chi_M' = \chi_S + (\chi_T - \chi_S) \frac{1 + (\omega\tau)^{1-\alpha} \sin\left(\alpha \frac{\pi}{2}\right)}{1 + 2(\omega\tau)^{1-\alpha} \sin\left(\alpha \frac{\pi}{2}\right) + (\omega\tau)^{2-2\alpha}}$$

$$\chi_M'' = (\chi_T - \chi_S) \frac{(\omega\tau)^{1-\alpha} \cos\left(\alpha \frac{\pi}{2}\right)}{1 + 2(\omega\tau)^{1-\alpha} \sin\left(\alpha \frac{\pi}{2}\right) + (\omega\tau)^{2-2\alpha}}$$

With  $\chi_T$  the isothermal susceptibility,  $\chi_S$  the adiabatic susceptibility,  $\tau$  the relaxation time and  $\alpha$  an empiric parameter which describe the distribution of the relaxation time. For SMM with only one relaxation time,  $\alpha$  is close to zero. The extended Debye model was applied to fit simultaneously the experimental variations of  $\chi_M'$  and  $\chi_M''$  with the frequency  $\nu$  of the oscillating field ( $\omega = 2\pi\nu$ ). Typically, only the temperatures for which a maximum on the  $\chi''$  vs.  $f$  curves, have been considered. The best fitted parameters  $\tau$ ,  $\alpha$ ,  $\chi_T$ ,  $\chi_S$  are listed in Tables S3, S5-S6 and S8-S10 with the coefficient of determination  $R^2$ .

**Table S4.** Best fitted parameters ( $\chi_{T,1}$ ,  $\chi_{S,1}$ ,  $\tau_1$ ,  $\alpha_1$ , ( $\chi_{T,2}$ ,  $\chi_{S,2}$ ,  $\tau_2$  and  $\alpha_2$ ) with the extended Debye model (Eq. S1) for compound **3** at 2 K in the magnetic field range 200-1600 Oe.

| H / Oe | $\chi_{T,1} / \text{cm}^3 \text{mol}^{-1}$ | $\chi_S / \text{cm}^3 \text{mol}^{-1}$ | $\tau_1 / \text{s}$ | $\alpha_1$ | $\chi_{T,2} / \text{cm}^3 \text{mol}^{-1}$ | $\alpha_2$ | $\tau_2 / \text{s}$ | $R^2$   |
|--------|--------------------------------------------|----------------------------------------|---------------------|------------|--------------------------------------------|------------|---------------------|---------|
| 200    | 3.37825                                    | 2.95761                                | 0.01921             | 0.33654    | 4.22332                                    | 0.26027    | 1.10158E-5          | 0.99998 |
| 400    | 3.66654                                    | 2.73227                                | 0.04393             | 0.30613    | 3.68578                                    | 0.23894    | 7.55752E-5          | 0.99999 |
| 600    | 3.45039                                    | 2.02836                                | 0.11814             | 0.39292    | 3.23137                                    | 0.21123    | 1.11113E-4          | 0.99985 |
| 800    | 3.6194                                     | 1.63867                                | 0.34566             | 0.47904    | 2.90569                                    | 0.17314    | 1.11327E-4          | 0.99977 |
| 1000   | 3.13061                                    | 1.11681                                | 0.41693             | 0.40683    | 2.75402                                    | 0.26921    | 9.45152E-5          | 0.99951 |
| 1200   | 2.75637                                    | 0.73791                                | 0.45268             | 0.36031    | 2.63551                                    | 0.35437    | 7.9492E-5           | 0.99961 |
| 1400   | 2.54155                                    | 0.59352                                | 0.42027             | 0.31904    | 2.54596                                    | 0.43427    | 6.80281E-5          | 0.99973 |
| 1600   | 2.58741                                    | 0.60431                                | 0.33618             | 0.31579    | 2.38037                                    | 0.43       | 5.58487E-5          | 0.99976 |

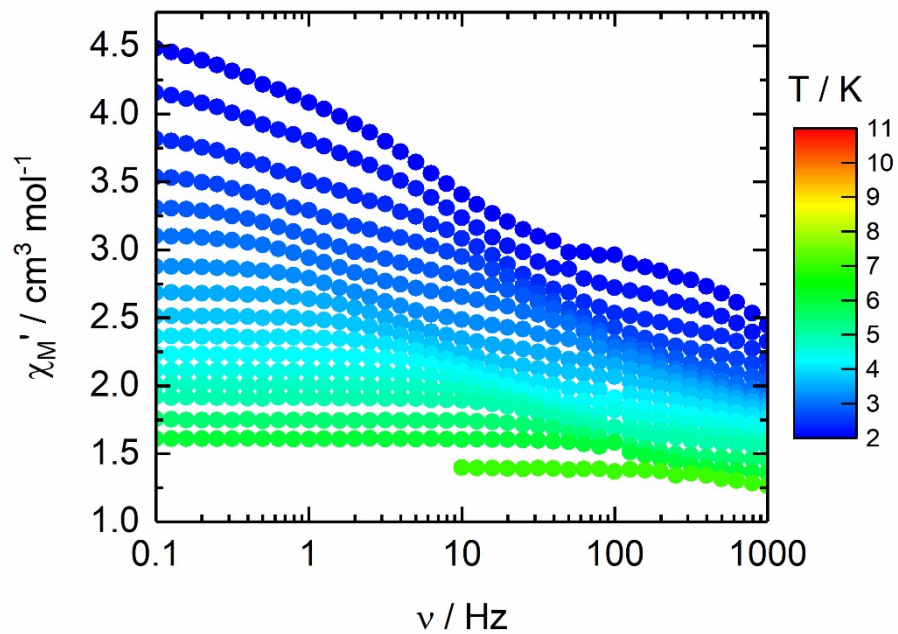

**Figure S4.** Thermal dependence of the in-phase component ( $\chi_M'$ ) of the magnetic susceptibility under an applied dc field of 800 Oe in the 0.1-1000 Hz frequency range for **3**.



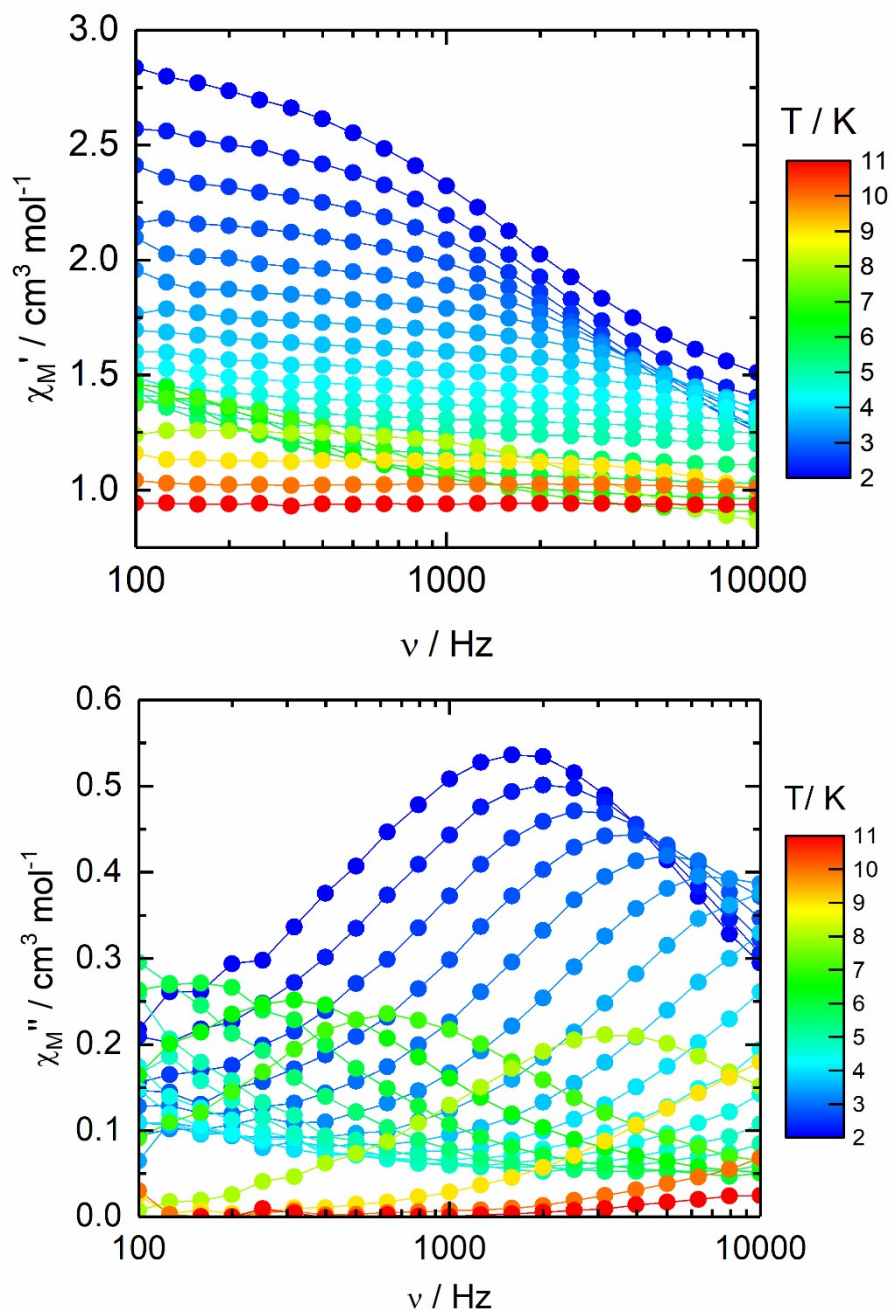

**Figure S5.** Thermal dependence of the in-phase ( $\chi_M'$ ) and out-of-phase ( $\chi_M''$ ) component of the magnetic susceptibility under an applied dc field of 800 Oe in the 100-10000 Hz frequency range for **3**.

**Table S5.** Best fitted parameters ( $\chi_{T,1}$ ,  $\chi_{S,1}$ ,  $\tau_1$ ,  $\alpha_1$ , ( $\chi_{T,2}$ ,  $\chi_{S,2}$ ,  $\tau_2$  and  $\alpha_2$ ) with the extended Debye model (Eq. S1) for compound **3** at 2 K in the temperature range of 2-7 K for LF contribution and 2-4.5 K for the MF.

| T / K | $\chi_{T,1} / \text{cm}^3 \text{mol}^{-1}$ | $\chi_S / \text{cm}^3 \text{mol}^{-1}$ | $\tau_1 / \text{s}$ | $\alpha_1$  | $\chi_{T,2} / \text{cm}^3 \text{mol}^{-1}$ | $\alpha_2$ | $\tau_2 / \text{s}$ | R <sup>2</sup> |
|-------|--------------------------------------------|----------------------------------------|---------------------|-------------|--------------------------------------------|------------|---------------------|----------------|
| 2     | 2.87334                                    | 2.6969                                 | 0.64708             | 2.65722E-12 | 4.4083                                     | 0.38874    | 0.02419             | 0.99999        |
| 2.2   | 2.73898                                    | 2.48942                                | 0.56009             | 0.07503     | 4.0081                                     | 0.38507    | 0.01624             | 0.99996        |
| 2.4   | 2.60518                                    | 2.27802                                | 0.36345             | 0.10316     | 3.54299                                    | 0.34962    | 0.00838             | 0.99998        |
| 2.6   | 2.54714                                    | 2.13409                                | 0.23596             | 0.14882     | 3.16489                                    | 0.28245    | 0.00444             | 0.99999        |
| 2.8   | 2.40253                                    | 1.98506                                | 0.16235             | 0.12556     | 2.91091                                    | 0.26481    | 0.00249             | 0.99999        |
| 3     | 2.21623                                    | 1.82167                                | 0.11976             | 0.11288     | 2.72297                                    | 0.30907    | 0.00134             | 0.99998        |
| 3.25  | 1.9127                                     | 1.59109                                | 0.07931             | 0.04831     | 2.56744                                    | 0.43534    | 5.85658E-4          | 0.99998        |
| 3.5   | 1.88318                                    | 1.55491                                | 0.04692             | 0.05049     | 2.36207                                    | 0.43296    | 3.67898E-4          | 0.99999        |
| 3.75  | 1.89377                                    | 1.56785                                | 0.0289              | 0.04819     | 2.19084                                    | 0.40776    | 2.97115E-4          | 0.99999        |
| 4     | 1.93511                                    | 1.59501                                | 0.01778             | 0.06575     | 2.02565                                    | 0.33973    | 2.82937E-4          | 0.99999        |
| 4.25  | 1.96669                                    | 1.61946                                | 0.01129             | 0.06812     | 1.88442                                    | 0.20395    | 3.1418E-4           | 0.99995        |
| 4.5   | 1.74884                                    | 1.49086                                | 0.00836             | 0           | 1.85644                                    | 0.44932    | 2.05141E-4          | 0.99998        |
| 4.75  | 2.64768                                    | 2.27598                                | 0.00427             | 0.11581     |                                            |            |                     | 0.99995        |
| 5     | 2.08201                                    | 1.7452                                 | 0.00322             | 0.10163     |                                            |            |                     | 0.99995        |
| 5.5   | 2.19791                                    | 1.89936                                | 0.00173             | 0.07417     |                                            |            |                     | 0.99998        |
| 6     | 1.9685                                     | 1.71861                                | 9.45639E-4          | 0.01537     |                                            |            |                     | 0.99995        |
| 7     | 1.22032                                    | 1.04729                                | 2.67959E-4          | 0.05541     |                                            |            |                     | 0.99994        |

**Table S6.** Best fitted parameters ( $\chi_T$ ,  $\chi_S$ ,  $\tau$  and  $\alpha$ ) with the extended Debye model (Eq. S2) for **3** at 800 Oe in the temperature range 2-3.5 K.

| T / K | $\chi_T / \text{cm}^3 \text{mol}^{-1}$ | $\chi_S / \text{cm}^3 \text{mol}^{-1}$ | $\alpha$ | $\tau / \text{s}$ | $R^2$   |
|-------|----------------------------------------|----------------------------------------|----------|-------------------|---------|
| 2     | 2.94814                                | 1.2773                                 | 0.28189  | 9.99227E-5        | 0.99976 |
| 2.25  | 2.66193                                | 1.13817                                | 0.27163  | 7.6471E-5         | 0.99959 |
| 2.5   | 2.43364                                | 1.02706                                | 0.26206  | 5.81079E-5        | 0.9996  |
| 2.75  | 2.22317                                | 0.9181                                 | 0.25322  | 4.09385E-5        | 0.99941 |
| 3     | 2.07516                                | 0.75307                                | 0.28964  | 2.56523E-5        | 0.99911 |
| 3.25  | 1.87405                                | 0.81613                                | 0.1803   | 2.01954E-5        | 0.99994 |
| 3.5   | 1.75297                                | 0.67576                                | 0.20326  | 1.18228E-5        | 0.99993 |

**Table S7.** Best fitted parameters ( $\chi_T$ ,  $\chi_S$ ,  $\tau$  and  $\alpha$ ) with the extended Debye model (Eq. S2) for **3** at 800 Oe in the temperature range 6-9 K.

| T / K | $\chi_T / \text{cm}^3 \text{mol}^{-1}$ | $\chi_S / \text{cm}^3 \text{mol}^{-1}$ | $\alpha$ | $\tau / \text{s}$ | $R^2$   |
|-------|----------------------------------------|----------------------------------------|----------|-------------------|---------|
| 6     | 1.7731                                 | 1.02586                                | 0.19471  | 0.00128           | 0.99964 |
| 6.5   | 1.57341                                | 0.95614                                | 0.13808  | 5.30576E-4        | 0.99975 |
| 7     | 1.43929                                | 0.89099                                | 0.11282  | 2.33685E-4        | 0.99975 |
| 8     | 1.25997                                | 0.78884                                | 0.06655  | 4.58688E-5        | 0.99991 |
| 9     | 1.1325                                 | 0.7028                                 | 0.05777  | 1.00361E-5        | 0.99987 |

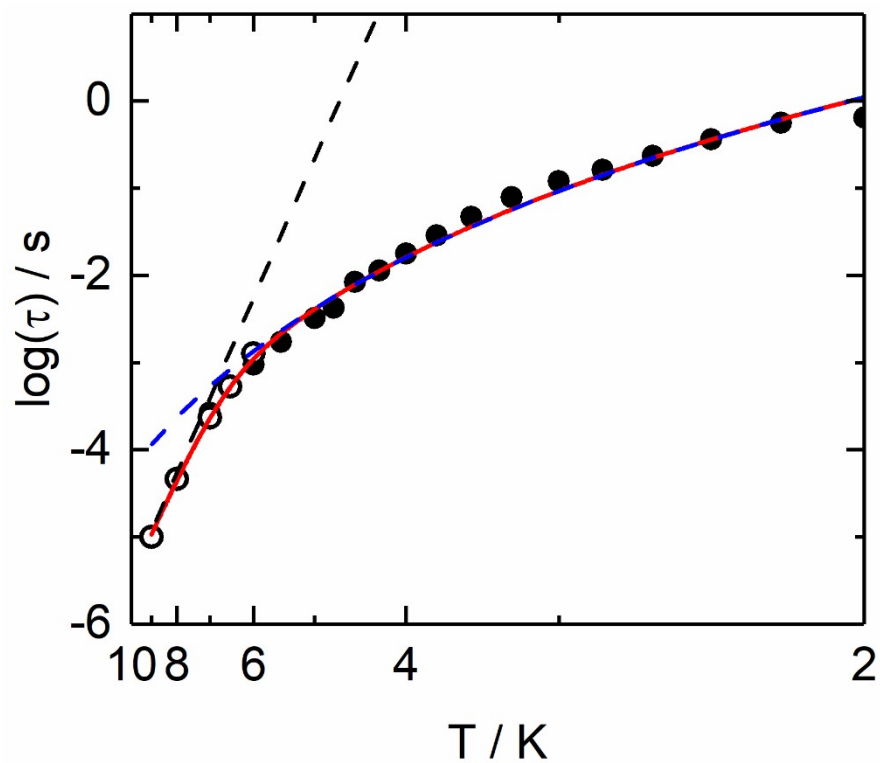

**Figure S6.** Thermal dependence of the LF relaxation time for **3** from 2 to 9 K at 800 Oe is depicted in full black dots from squid measurements and in open black circles from ppms measurements. The red line depicts the best fit with parameters given in the main text. Dashed black and blue lines are the separated Orbach and Raman processes, respectively.

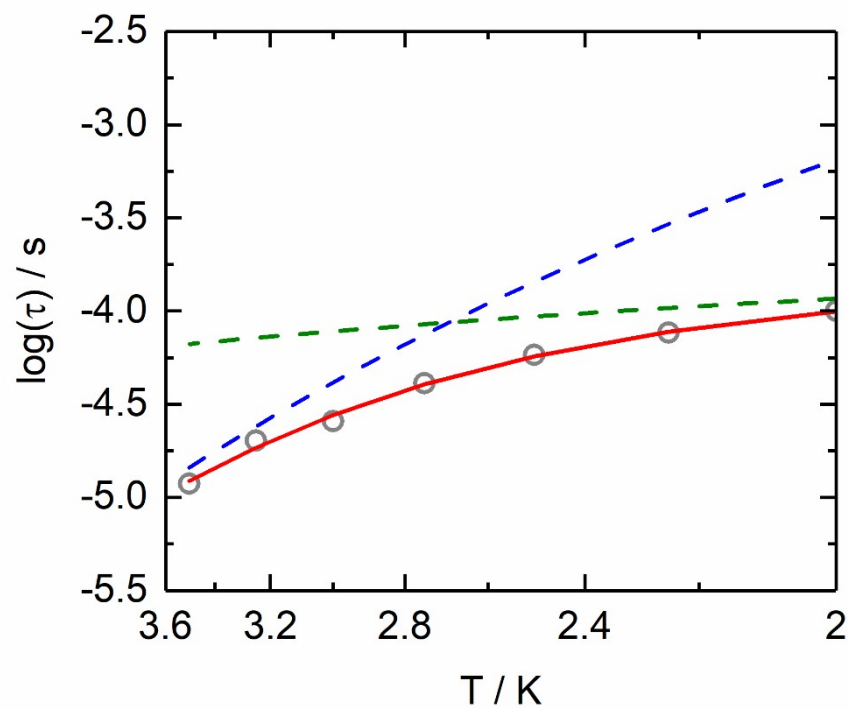

**Figure S7.** Thermal dependence of the HF relaxation time for **3** from 2 to 3.5 K at 800 Oe. The red line depicts the best fit with parameters given in the main text. Dashed blue and green lines are the separated Raman and direct processes, respectively.

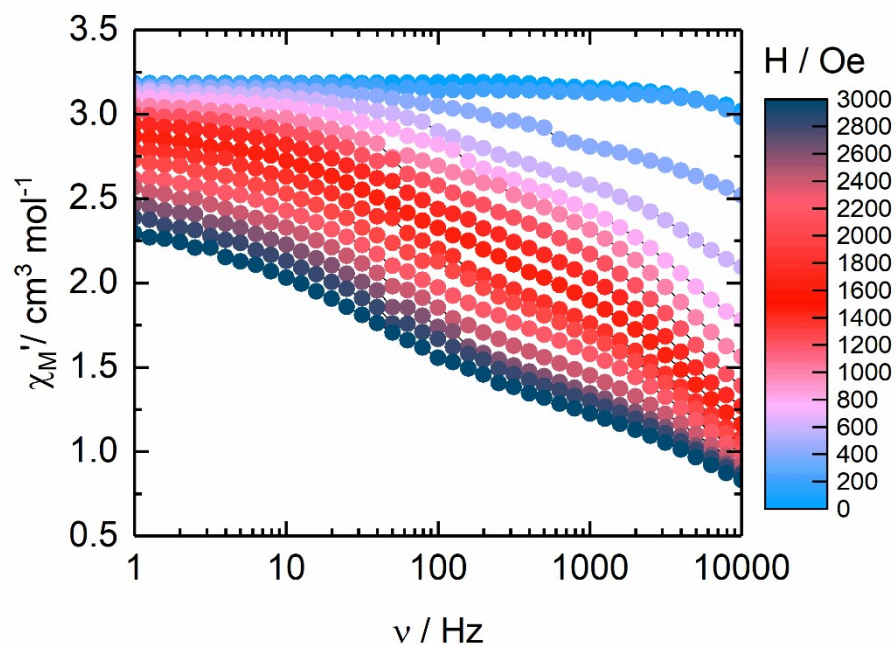

**Figure S8.** Field dependence of the in-phase component ( $\chi_M'$ ) of the magnetic susceptibility at 2 K for 4.

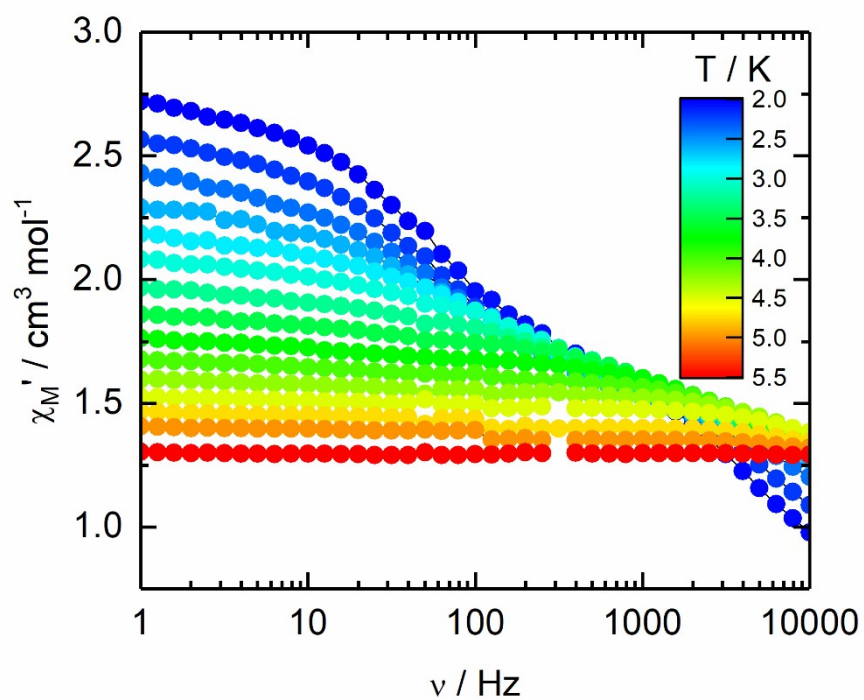

**Figure S9.** Thermal dependence of the in-phase component ( $\chi_M'$ ) of the magnetic susceptibility under an applied dc field of 2200 Oe in the 1-10000 Hz frequency range for **4**.

**Table S8.** Best fitted parameters ( $\chi_{T,1}$ ,  $\chi_{S,1}$ ,  $\tau_1$ ,  $\alpha_1$ , ( $\chi_{T,2}$ ,  $\chi_{S,2}$ ,  $\tau_2$  and  $\alpha_2$ ) with the extended Debye model (Eq. S1) for compound **4** at 2 K in the temperature range of 2-4.5 K for LF contribution and 2-2.4 K for the HF.

| T / K | $\chi_{T,1} / \text{cm}^3 \text{mol}^{-1}$ | $\chi_S / \text{cm}^3 \text{mol}^{-1}$ | $\tau_1 / \text{s}$ | $\alpha_1$ | $\chi_{T,2} / \text{cm}^3 \text{mol}^{-1}$ | $\alpha_2$ | $\tau_2 / \text{s}$ | R <sup>2</sup> |
|-------|--------------------------------------------|----------------------------------------|---------------------|------------|--------------------------------------------|------------|---------------------|----------------|
| 2     | 1.56883                                    | 0.44954                                | 0.00323             | 0.29073    | 1.624                                      | 0.26281    | 2.18237E-5          | 0.99983        |
| 2.2   | 1.57185                                    | 0.49511                                | 0.00292             | 0.32998    | 1.51913                                    | 0.22898    | 1.35073E-5          | 0.99987        |
| 2.4   | 1.36414                                    | 0.37956                                | 0.0023              | 0.36322    | 1.46308                                    | 0.24293    | 6.47715E-6          | 0.99992        |
| 2.6   | 1.56296                                    | 0.61061                                | 0.00144             | 0.41102    | 1.37083                                    | 0.13301    |                     | 0.99991        |
| 2.8   | 1.72703                                    | 0.92397                                | 8.91798E-4          | 0.40427    | 1.3842                                     | 0.08962    |                     | 0.99996        |
| 3     | 1.89328                                    | 1.04835                                | 3.53743E-4          | 0.5027     | 1.25791                                    | 0          |                     | 0.99991        |
| 3.25  | 2.8482                                     | 1.60646                                | 1.51815E-4          | 0.53005    | 0.85936                                    | 0.52366    |                     | 0.99997        |
| 3.5   | 2.96376                                    | 2.34791                                | 5.8825E-5           | 0.35681    | 0                                          | 1          |                     | 0.99993        |
| 3.75  | 2.82506                                    | 2.25706                                | 2.9618E-5           | 0.31365    | 0                                          | 1          |                     | 0.99998        |
| 4     | 2.69354                                    | 2.15882                                | 1.57407E-5          | 0.27608    | 0                                          | 1          |                     | 0.99997        |
| 4.25  | 2.63594                                    | 2.17602                                | 1.04962E-5          | 0.21941    | 0                                          | 1          |                     | 0.99996        |

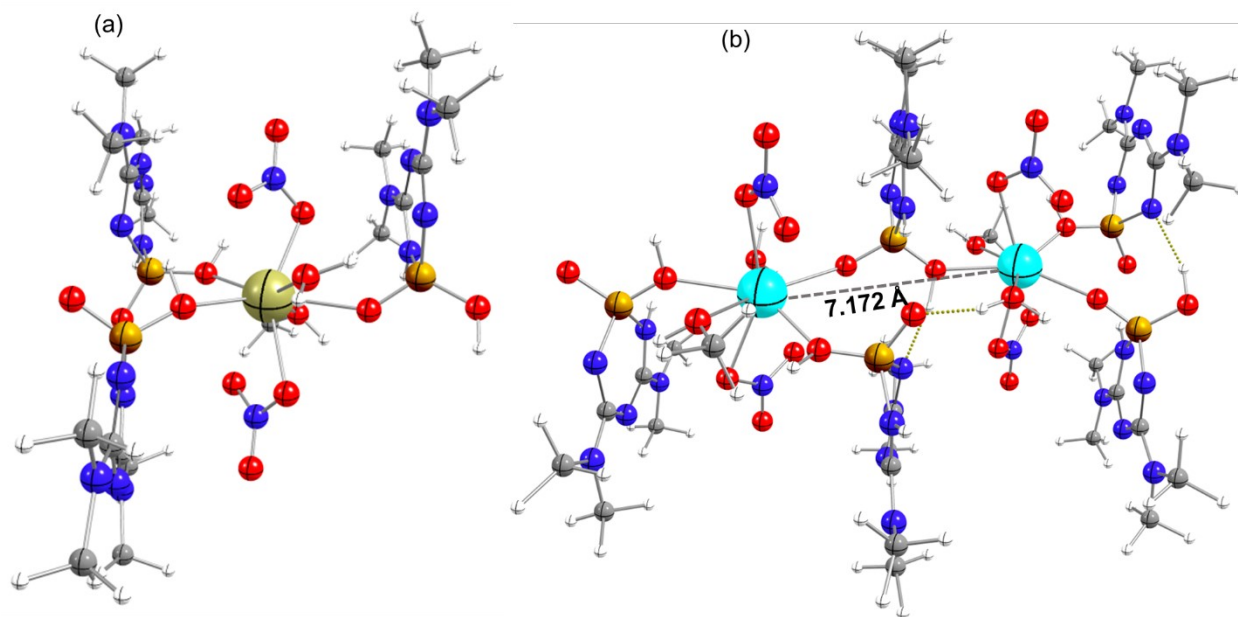

**Figure S10.** (a) Mononuclear model for complexes **2-4** that have been used in the *Ab-initio* calculations; (b) Dimeric model structure obtained from the crystal structure of complex **1** to compute the intermolecular exchange interaction employing BS-DFT.

**Table S9.** Basis functions used in *ab initio* CASSCF calculations using MOLCAS 8.2 code.

| Atoms      | ANO-RCC basis functions |
|------------|-------------------------|
| H          | 2s                      |
| C          | 3s2p                    |
| N, P, O    | 3s2p1d                  |
| Dy, Tb, Er | 8s7p5d3f2g1h            |



**Table S10.** RASSI-SO computed low-lying 7 septet (in red) and 140 quintet states (in black) along with spin-orbit coupled states (in blue, Kramer pseudo doublets) for Tb centre in **2**. All the values are reported here in cm<sup>-1</sup>.

| <b>Tb</b> |         |         |              |
|-----------|---------|---------|--------------|
| 0.0       | 35285.8 | 45903.7 | 75193.6      |
| 90.6      | 35368.7 | 45930.1 | 75212.4      |
| 145.6     | 35375.6 | 45960.4 | 75224.4      |
| 169.5     | 35382.1 | 45969.9 | 75244.3      |
| 383.8     | 35406.6 | 45992.4 | 75274.2      |
| 560.5     | 35434.9 | 46000.2 | 75293.4      |
| 565.3     | 35442.5 | 50103.1 | 75313.3      |
| 25660.2   | 35473.6 | 50114.4 | 75351.5      |
| 25674.3   | 35532.0 | 50169.3 | 77503.4      |
| 25715.1   | 35536.8 | 50187.3 | 77570.1      |
| 25788.2   | 40221.9 | 50218.9 | 77629.7      |
| 25798.2   | 40262.5 | 50222.7 | 77686.7      |
| 29220.3   | 40267.2 | 50280.9 | 77714.7      |
| 29220.5   | 40307.3 | 50286.1 | 77742.3      |
| 29286.0   | 40347.1 | 51775.4 | 77778.8      |
| 29292.0   | 40377.4 | 51808.2 | 93188.6      |
| 29315.5   | 40393.9 | 51920.6 | 93209.2      |
| 29322.3   | 40410.3 | 51943.0 | 93384.1      |
| 29336.4   | 40439.3 | 52054.7 | 93395.5      |
| 29347.3   | 40451.5 | 54537.8 | 93526.9      |
| 29356.6   | 40459.1 | 54678.9 | 93625.1      |
| 29392.7   | 40459.6 | 54803.2 | 93629.0      |
| 29400.3   | 40503.3 | 57660.2 | 93816.4      |
| 29439.2   | 40519.0 | 57663.9 | 93821.0      |
| 29448.6   | 40529.2 | 57690.5 | 95220.5      |
| 29474.6   | 40565.4 | 57748.5 | 95243.3      |
| 29479.5   | 40588.1 | 57772.1 | 95438.2      |
| 29507.2   | 40627.7 | 57775.8 | 95574.2      |
| 29508.3   | 40689.4 | 57802.7 | 3389952726.9 |
| 30617.2   | 40707.8 | 57837.9 | 3389952726.9 |
| 30630.9   | 45728.8 | 57898.9 |              |
| 30668.1   | 45730.0 | 57926.8 |              |
| 30685.1   | 45806.8 | 57941.2 |              |
| 30699.8   | 45816.8 | 68512.9 |              |
| 30709.9   | 45818.0 | 75067.4 |              |
| 30755.1   | 45824.8 | 75103.7 |              |
| 30810.2   | 45840.7 | 75115.2 |              |
| 30839.5   | 45855.5 | 75147.8 |              |
| 35271.5   | 45877.5 | 75159.3 |              |

---

**SPIN-ORBIT STATES**

---

|        |         |         |         |
|--------|---------|---------|---------|
| 0.0    | 5857.0  | 31336.3 | 32524.4 |
| 0.3    | 5967.9  | 31344.9 | 32534.7 |
| 34.7   | 6110.6  | 31352.9 | 32543.6 |
| 35.7   | 23506.4 | 31369.0 | 32548.9 |
| 116.8  | 23507.0 | 31396.8 | 32556.6 |
| 121.4  | 23536.7 | 31449.5 | 32578.9 |
| 181.1  | 23541.7 | 31460.7 | 32579.7 |
| 197.8  | 23549.3 | 31597.5 | 32602.3 |
| 228.3  | 23571.8 | 31597.6 | 32605.7 |
| 296.1  | 23579.3 | 31668.0 | 32615.7 |
| 300.5  | 23611.7 | 31672.4 | 32618.7 |
| 363.7  | 23612.7 | 31675.8 | 32629.0 |
| 364.2  | 29449.8 | 31680.1 | 32631.2 |
| 2086.3 | 29455.5 | 31688.6 | 32684.9 |
| 2088.6 | 29459.4 | 31699.6 | 32688.0 |
| 2207.5 | 29461.5 | 31706.7 | 32728.7 |
| 2223.9 | 29464.4 | 31709.4 | 32739.8 |
| 2241.4 | 29469.0 | 31716.2 | 32748.6 |
| 2242.0 | 29474.7 | 31741.2 | 32755.6 |
| 2250.2 | 30089.2 | 31742.4 | 32757.1 |
| 2296.2 | 30089.3 | 31774.5 | 32771.7 |
| 2306.5 | 30153.1 | 31777.1 | 32781.6 |
| 2354.6 | 30153.9 | 31781.7 | 32790.7 |
| 2365.1 | 30170.2 | 31784.7 | 32796.8 |
| 3460.3 | 30172.1 | 31789.7 | 32827.6 |
| 3539.0 | 30189.5 | 31792.5 | 32841.8 |
| 3551.5 | 30191.3 | 31958.1 | 32879.2 |
| 3572.3 | 30205.3 | 31977.4 | 32884.5 |
| 3596.4 | 30207.4 | 31986.9 | 32903.0 |
| 3615.6 | 30211.6 | 32020.7 | 32907.1 |
| 3635.4 | 30216.0 | 32036.0 | 32922.8 |
| 3688.6 | 30222.9 | 32129.4 | 32934.0 |
| 3727.0 | 30256.9 | 32130.9 | 32943.9 |
| 4577.8 | 30259.5 | 32198.7 | 32949.3 |
| 4582.8 | 30294.7 | 32205.1 | 32957.0 |
| 4618.6 | 30296.0 | 32210.5 | 32967.7 |
| 4633.9 | 30322.8 | 32223.1 | 32971.9 |
| 4653.6 | 30323.1 | 32229.0 | 32988.0 |
| 4666.2 | 30339.9 | 32239.5 | 32991.0 |
| 4679.3 | 30339.9 | 32245.9 | 33013.5 |
| 5266.6 | 31190.9 | 32289.3 | 33039.5 |
| 5329.0 | 31192.2 | 32294.0 | 33050.4 |
| 5346.7 | 31268.5 | 32447.4 | 33068.0 |
| 5429.9 | 31271.9 | 32447.5 | 33073.8 |
| 5449.5 | 31322.0 | 32510.1 | 33112.9 |

---

---

|         |         |         |         |
|---------|---------|---------|---------|
| 5745.6  | 31328.6 | 32510.2 | 33125.1 |
| 33133.1 | 38322.8 | 41851.1 | 44412.7 |
| 33143.6 | 38331.0 | 41856.4 | 44428.1 |
| 33162.3 | 39043.8 | 41889.4 | 44441.3 |
| 33168.0 | 39045.8 | 41905.6 | 44443.7 |
| 33357.7 | 39074.5 | 41979.3 | 44471.9 |
| 33372.5 | 39077.0 | 41998.6 | 44486.0 |
| 33395.6 | 39085.6 | 42027.1 | 44494.5 |
| 33404.6 | 39087.4 | 42038.2 | 44506.4 |
| 33425.9 | 39100.2 | 42080.7 | 44508.1 |
| 33438.1 | 39109.9 | 42138.8 | 44528.2 |
| 33449.9 | 39116.0 | 42230.4 | 44536.6 |
| 34005.5 | 39125.0 | 42888.6 | 44540.8 |
| 34014.1 | 39127.4 | 42904.9 | 44558.1 |
| 34059.9 | 39541.2 | 42965.4 | 44561.7 |
| 34076.3 | 39543.9 | 42985.4 | 44577.3 |
| 34100.4 | 39554.3 | 43037.7 | 44582.6 |
| 34323.4 | 39557.5 | 43082.4 | 44590.5 |
| 34372.8 | 39568.7 | 43159.8 | 44602.6 |
| 34422.3 | 39570.0 | 43208.8 | 44610.0 |
| 35641.2 | 39581.1 | 43334.1 | 44615.8 |
| 36464.6 | 39587.5 | 43341.1 | 44622.4 |
| 36465.4 | 39595.5 | 43341.9 | 44624.6 |
| 36503.5 | 39963.1 | 43369.1 | 44639.7 |
| 36505.2 | 39976.6 | 43370.0 | 44643.5 |
| 36540.0 | 39988.4 | 43389.2 | 44649.3 |
| 36542.9 | 40023.1 | 43393.3 | 44663.5 |
| 36582.0 | 40043.6 | 43403.0 | 44852.8 |
| 36583.5 | 40060.7 | 43410.8 | 44864.0 |
| 36590.5 | 40081.2 | 43414.2 | 44894.4 |
| 36596.4 | 41694.5 | 43426.7 | 44895.6 |
| 36599.1 | 41696.2 | 43428.7 | 44919.8 |
| 36607.6 | 41709.1 | 43445.2 | 44939.1 |
| 36612.5 | 41714.9 | 43445.7 | 44943.3 |
| 36645.6 | 41727.9 | 43459.8 | 44960.3 |
| 36646.4 | 41733.1 | 43459.9 | 44962.6 |
| 38181.4 | 41742.5 | 43892.6 | 44976.5 |
| 38182.9 | 41754.5 | 43909.9 | 44977.7 |
| 38229.9 | 41768.5 | 43964.1 | 46847.3 |
| 38233.5 | 41784.1 | 44019.1 | 46853.1 |
| 38243.9 | 41788.9 | 44024.8 | 46877.2 |
| 38247.9 | 41792.8 | 44079.1 | 46891.2 |
| 38269.2 | 41795.2 | 44133.9 | 46891.2 |
| 38273.4 | 41812.0 | 44352.5 | 47706.4 |
| 38287.5 | 41813.7 | 44357.1 | 47706.4 |
| 38298.6 | 41832.7 | 44373.8 | 47742.3 |

---

---

|         |         |         |         |
|---------|---------|---------|---------|
| 38302.6 | 41841.8 | 44403.5 | 47743.5 |
| 47767.6 | 49178.0 | 50825.8 | 51200.7 |
| 47773.8 | 49189.0 | 50826.1 | 51208.7 |
| 47785.4 | 49205.4 | 50840.1 | 51212.6 |
| 47789.7 | 49206.6 | 50847.6 | 51213.4 |
| 47805.2 | 49209.3 | 50899.8 | 51229.4 |
| 47812.0 | 49211.2 | 50900.9 | 51230.7 |
| 47835.8 | 49212.4 | 50902.1 | 51236.6 |
| 47847.8 | 49219.5 | 50929.4 | 51239.4 |
| 47850.4 | 49231.3 | 50936.3 | 51241.3 |
| 47860.5 | 49237.3 | 50955.3 | 51246.8 |
| 47869.8 | 49239.7 | 50955.4 | 51250.5 |
| 47896.9 | 49240.8 | 50956.3 | 51255.9 |
| 47901.2 | 49244.9 | 50964.0 | 51257.9 |
| 47912.4 | 49248.1 | 50976.3 | 51259.3 |
| 47915.0 | 49254.6 | 50978.8 | 51267.6 |
| 48227.3 | 49255.3 | 50992.2 | 51272.2 |
| 48227.4 | 49258.3 | 51002.1 | 51274.5 |
| 48289.2 | 49259.5 | 51002.6 | 51278.3 |
| 48297.3 | 49272.6 | 51004.9 | 51281.4 |
| 48306.7 | 49281.1 | 51006.2 | 51285.4 |
| 48312.2 | 49298.5 | 51020.3 | 51291.5 |
| 48314.5 | 49300.6 | 51021.3 | 51293.4 |
| 48320.0 | 49308.9 | 51031.3 | 51294.7 |
| 48332.6 | 49339.2 | 51036.3 | 51296.0 |
| 48337.4 | 49343.9 | 51048.6 | 51319.3 |
| 48345.2 | 50513.1 | 51057.0 | 51321.0 |
| 48382.0 | 50513.2 | 51063.1 | 51423.2 |
| 48386.4 | 50577.7 | 51063.3 | 51423.5 |
| 49089.2 | 50586.5 | 51064.7 | 51478.6 |
| 49090.5 | 50604.2 | 51075.4 | 51509.3 |
| 49096.7 | 50608.8 | 51076.4 | 51569.7 |
| 49098.1 | 50620.1 | 51077.5 | 51598.8 |
| 49110.2 | 50633.6 | 51092.4 | 51631.3 |
| 49110.3 | 50636.2 | 51102.8 | 51667.0 |
| 49122.0 | 50639.3 | 51105.7 | 51681.8 |
| 49124.0 | 50666.9 | 51121.4 | 51686.4 |
| 49137.7 | 50678.1 | 51125.2 | 51824.6 |
| 49138.6 | 50680.1 | 51135.0 | 51859.5 |
| 49143.7 | 50703.4 | 51135.8 | 51865.9 |
| 49150.3 | 50710.9 | 51139.0 | 51871.3 |
| 49153.6 | 50725.9 | 51151.5 | 51889.8 |
| 49155.4 | 50726.6 | 51156.8 | 51904.2 |
| 49160.5 | 50752.9 | 51163.3 | 51914.4 |
| 49166.1 | 50753.5 | 51164.0 | 51939.3 |
| 49168.2 | 50779.4 | 51192.4 | 51954.4 |

---

---

|         |         |         |         |
|---------|---------|---------|---------|
| 49172.1 | 50781.0 | 51199.0 | 52042.3 |
| 52046.2 | 52920.1 | 53675.3 | 55191.5 |
| 52046.3 | 52928.1 | 53680.5 | 55268.0 |
| 52046.7 | 52930.3 | 53681.9 | 55395.6 |
| 52068.5 | 52941.9 | 53702.2 | 55536.5 |
| 52074.3 | 52942.7 | 53706.9 | 55594.9 |
| 52075.8 | 52947.4 | 53707.3 | 55609.1 |
| 52090.2 | 52957.8 | 53712.1 | 55609.3 |
| 52098.4 | 52970.0 | 53712.2 | 55628.2 |
| 52100.6 | 52970.5 | 53719.4 | 55711.2 |
| 52122.2 | 52994.9 | 53724.8 | 55720.9 |
| 52154.6 | 52995.8 | 53727.1 | 55726.6 |
| 52158.6 | 53006.4 | 53754.9 | 55730.2 |
| 52541.9 | 53021.0 | 53906.5 | 55743.8 |
| 52642.8 | 53025.4 | 53989.7 | 55752.3 |
| 52701.7 | 53026.8 | 54035.8 | 55759.1 |
| 52706.5 | 53047.6 | 54043.0 | 55761.5 |
| 52708.2 | 53048.0 | 54072.0 | 55782.5 |
| 52717.4 | 53134.1 | 54073.0 | 55783.8 |
| 52725.2 | 53342.1 | 54102.6 | 55858.3 |
| 52725.5 | 53362.7 | 54329.3 | 55862.2 |
| 52738.8 | 53364.1 | 54349.5 | 55931.9 |
| 52750.7 | 53371.7 | 54362.3 | 55937.8 |
| 52766.9 | 53390.9 | 54385.8 | 55955.0 |
| 52768.6 | 53402.1 | 54394.7 | 55961.7 |
| 52780.3 | 53417.8 | 54403.4 | 55972.2 |
| 52790.3 | 53427.0 | 54415.8 | 55982.4 |
| 52796.2 | 53462.0 | 54425.7 | 55984.1 |
| 52799.8 | 53469.6 | 54434.1 | 56013.5 |
| 52803.1 | 53479.6 | 54435.3 | 56018.0 |
| 52813.9 | 53484.9 | 54460.9 | 56197.4 |
| 52819.6 | 53492.8 | 54463.4 | 56346.0 |
| 52822.6 | 53503.4 | 54477.0 | 56681.3 |
| 52829.4 | 53524.4 | 54489.4 | 56721.3 |
| 52834.7 | 53528.3 | 54502.0 | 56959.9 |
| 52844.4 | 53544.6 | 54502.1 | 57513.4 |
| 52857.2 | 53572.0 | 54520.3 | 57539.6 |
| 52857.8 | 53572.1 | 54520.6 | 57555.4 |
| 52858.1 | 53580.8 | 54607.3 | 57573.8 |
| 52860.4 | 53629.2 | 54735.1 | 57631.5 |
| 52868.9 | 53629.9 | 54929.7 | 58425.4 |
| 52873.1 | 53630.0 | 55000.6 | 58425.5 |
| 52876.1 | 53641.6 | 55105.9 | 58427.1 |
| 52896.4 | 53652.4 | 55138.2 | 58427.8 |
| 52898.9 | 53653.2 | 55152.7 | 58449.0 |
| 52900.2 | 53653.8 | 55182.3 | 58462.7 |

---

---

|         |         |         |         |
|---------|---------|---------|---------|
| 52904.0 | 53670.3 | 55182.8 | 58469.4 |
| 58472.9 | 58703.4 | 59493.5 | 60421.4 |
| 58475.1 | 58705.8 | 59496.6 | 60722.0 |
| 58491.6 | 58727.1 | 59512.0 | 60753.8 |
| 58505.9 | 58729.3 | 59520.9 | 60776.8 |
| 58508.5 | 58734.0 | 59524.2 | 60799.4 |
| 58518.4 | 58734.6 | 59534.9 | 60811.7 |
| 58518.8 | 58747.7 | 59550.2 | 60969.0 |
| 58528.3 | 58779.0 | 59555.1 | 60986.6 |
| 58528.6 | 58779.1 | 59558.0 | 60992.6 |
| 58529.0 | 58813.2 | 59562.8 | 61014.4 |
| 58540.7 | 58814.9 | 59571.2 | 61021.1 |
| 58544.9 | 58817.3 | 59583.1 | 61027.4 |
| 58563.8 | 58820.0 | 59588.6 | 61033.5 |
| 58563.8 | 58828.2 | 59594.8 | 61037.8 |
| 58564.8 | 58834.8 | 59606.0 | 61090.7 |
| 58567.6 | 58834.8 | 59620.6 | 61097.5 |
| 58570.8 | 58854.5 | 59623.3 | 61127.9 |
| 58573.4 | 58872.7 | 59641.8 | 61133.8 |
| 58575.5 | 58887.2 | 59649.7 | 61144.2 |
| 58584.5 | 58898.3 | 59662.5 | 61169.0 |
| 58584.5 | 58899.5 | 59699.8 | 61183.7 |
| 58586.9 | 58907.9 | 59707.1 | 61210.1 |
| 58592.5 | 58911.3 | 59713.8 | 61221.7 |
| 58593.0 | 58915.1 | 59725.0 | 61400.1 |
| 58593.2 | 58926.1 | 59748.5 | 61479.6 |
| 58609.0 | 58930.0 | 59754.1 | 61487.6 |
| 58619.8 | 58930.4 | 59757.2 | 61513.1 |
| 58628.2 | 58951.4 | 59759.6 | 61513.6 |
| 58630.2 | 58951.6 | 59777.9 | 61525.9 |
| 58633.8 | 58960.6 | 59780.0 | 61526.6 |
| 58641.2 | 58995.7 | 59781.6 | 61531.1 |
| 58641.9 | 59014.4 | 59794.7 | 61531.4 |
| 58642.3 | 59018.1 | 59799.3 | 61532.1 |
| 58644.7 | 59025.9 | 59804.7 | 61545.6 |
| 58645.5 | 59028.7 | 59804.8 | 61556.8 |
| 58651.8 | 59038.0 | 59808.9 | 61565.9 |
| 58652.3 | 59046.7 | 60349.1 | 61566.0 |
| 58653.2 | 59048.9 | 60362.4 | 61577.7 |
| 58653.9 | 59078.0 | 60372.2 | 61578.3 |
| 58654.4 | 59084.8 | 60373.0 | 61583.3 |
| 58670.7 | 59127.9 | 60374.5 | 61586.3 |
| 58671.1 | 59128.9 | 60385.3 | 61595.9 |
| 58671.2 | 59159.5 | 60390.9 | 61601.4 |
| 58672.3 | 59164.8 | 60391.1 | 61602.0 |
| 58672.4 | 59176.6 | 60403.5 | 61602.3 |

---

---

|         |         |         |         |
|---------|---------|---------|---------|
| 58685.2 | 59195.5 | 60415.3 | 61603.9 |
| 61609.4 | 63527.9 | 65981.3 | 66902.3 |
| 61637.8 | 63584.0 | 66042.1 | 66917.2 |
| 61637.9 | 63585.5 | 66042.2 | 66938.4 |
| 61642.6 | 63831.4 | 66042.2 | 66972.4 |
| 61737.9 | 64729.1 | 66042.7 | 66981.6 |
| 61763.5 | 64769.8 | 66042.9 | 67023.5 |
| 61792.2 | 64804.1 | 66042.9 | 67032.9 |
| 61794.1 | 64843.6 | 66068.1 | 67244.9 |
| 61802.7 | 64843.6 | 66070.0 | 67247.2 |
| 61807.5 | 64890.2 | 66072.5 | 67283.9 |
| 61812.2 | 64890.7 | 66101.5 | 67294.7 |
| 61819.1 | 64921.4 | 66107.8 | 67338.1 |
| 62218.1 | 64927.4 | 66144.9 | 67348.0 |
| 62219.2 | 64929.5 | 66148.9 | 67370.3 |
| 62254.0 | 64929.9 | 66149.8 | 67372.8 |
| 62256.7 | 64966.2 | 66153.5 | 67387.5 |
| 62266.0 | 64978.0 | 66172.3 | 67414.6 |
| 62271.1 | 65007.7 | 66185.4 | 67415.0 |
| 62273.1 | 65008.9 | 66186.8 | 67423.5 |
| 62283.4 | 65020.5 | 66197.1 | 67424.9 |
| 62284.1 | 65055.3 | 66197.1 | 67452.7 |
| 62288.3 | 65059.9 | 66197.8 | 67452.9 |
| 62302.1 | 65098.3 | 66215.8 | 67473.0 |
| 62309.4 | 65099.1 | 66216.0 | 67473.5 |
| 62310.0 | 65439.4 | 66221.8 | 67479.6 |
| 62383.1 | 65444.4 | 66225.4 | 67481.0 |
| 62383.6 | 65457.5 | 66236.6 | 67501.7 |
| 63133.0 | 65477.5 | 66245.3 | 67506.1 |
| 63224.1 | 65493.9 | 66245.5 | 67517.7 |
| 63287.6 | 65495.9 | 66270.3 | 67520.6 |
| 63361.8 | 65523.7 | 66292.6 | 67532.8 |
| 63391.4 | 65535.5 | 66411.6 | 67538.3 |
| 63392.2 | 65552.2 | 66447.7 | 67546.5 |
| 63409.3 | 65566.0 | 66483.4 | 67552.8 |
| 63437.8 | 65576.8 | 66530.9 | 67556.5 |
| 63467.6 | 65608.5 | 66540.0 | 67563.1 |
| 63477.0 | 65632.1 | 66540.9 | 67565.3 |
| 63491.0 | 65642.9 | 66559.9 | 67594.7 |
| 63491.9 | 65685.5 | 66760.4 | 67595.5 |
| 63501.5 | 65698.8 | 66760.6 | 68019.3 |
| 63509.6 | 65719.1 | 66822.3 | 68020.0 |
| 63513.0 | 65725.2 | 66824.2 | 68059.1 |
| 63514.2 | 65965.3 | 66855.5 | 68059.5 |
| 63516.1 | 65976.4 | 66856.4 | 68090.8 |
| 63523.7 | 65977.0 | 66860.1 | 68091.1 |

---

---

|         |         |         |         |
|---------|---------|---------|---------|
| 63527.6 | 65981.3 | 66876.0 | 68123.2 |
| 68136.2 | 69073.4 | 79981.1 | 81580.9 |
| 68139.4 | 69077.9 | 79991.6 | 81602.3 |
| 68170.1 | 69142.8 | 80000.3 | 81632.0 |
| 68170.8 | 69143.9 | 80004.4 | 81644.8 |
| 68205.6 | 73544.5 | 80037.1 | 81696.3 |
| 68207.4 | 73546.7 | 80037.5 | 81700.5 |
| 68238.9 | 73560.2 | 80054.3 | 82092.7 |
| 68239.0 | 73572.4 | 80055.0 | 82095.7 |
| 68266.2 | 73574.7 | 80535.7 | 82161.9 |
| 68267.7 | 77645.5 | 80537.9 | 82177.0 |
| 68393.2 | 77654.9 | 80559.3 | 82187.4 |
| 68399.9 | 77678.4 | 80560.7 | 82220.0 |
| 68427.8 | 77704.3 | 80574.2 | 82237.2 |
| 68476.3 | 77719.2 | 80578.7 | 82270.8 |
| 68501.2 | 77729.4 | 80596.6 | 82277.7 |
| 68546.0 | 77740.1 | 80598.0 | 82325.0 |
| 68556.9 | 77760.3 | 80598.8 | 82325.7 |
| 68611.2 | 77765.2 | 80617.3 | 95231.8 |
| 68621.9 | 77780.0 | 80647.4 | 95264.4 |
| 68667.7 | 77797.9 | 80653.2 | 95415.7 |
| 68670.1 | 77809.9 | 80656.6 | 95448.6 |
| 68683.8 | 77825.8 | 80665.3 | 95569.0 |
| 68713.5 | 77847.0 | 80747.4 | 95602.2 |
| 68716.0 | 77851.2 | 80771.2 | 95714.8 |
| 68736.1 | 77862.2 | 80789.4 | 95947.9 |
| 68751.8 | 77862.6 | 80802.3 | 95971.5 |
| 68774.4 | 79013.7 | 80813.6 | 96108.0 |
| 68787.9 | 79013.9 | 80942.4 | 96148.5 |
| 68810.9 | 79038.9 | 80960.1 | 96158.5 |
| 68820.4 | 79041.0 | 80976.6 | 96183.2 |
| 68826.4 | 79056.4 | 80996.6 | 96289.2 |
| 68853.6 | 79063.8 | 81004.8 | 96303.4 |
| 68854.0 | 79070.1 | 81017.6 | 96734.7 |
| 68876.6 | 79082.1 | 81023.1 | 96736.0 |
| 68887.6 | 79083.4 | 81032.6 | 96830.3 |
| 68917.9 | 79100.5 | 81035.6 | 96877.6 |
| 68918.8 | 79101.0 | 81065.3 | 96931.1 |
| 68962.9 | 79117.5 | 81097.4 | 96949.3 |
| 68964.6 | 79117.6 | 81123.4 | 96977.3 |
| 69011.8 | 79128.2 | 81127.6 | 96994.3 |
| 69015.8 | 79128.2 | 81157.3 | 97083.0 |
| 69029.2 | 79933.6 | 81167.6 | 97131.8 |
| 69032.0 | 79935.3 | 81190.4 | 97575.9 |
| 69053.9 | 79947.2 | 81525.7 | 97583.0 |
| 69055.5 | 79950.7 | 81531.2 | 97681.8 |

---





**Table S11.** RASSI-SO computed low-lying 21 spin-free sextet states and the spin-orbit coupled (Kramer doublets) for Dy centre in **3**. All the values are reported here in  $\text{cm}^{-1}$ . The values in red colour are for the spin-free sextet states while values in the blue colour are for the spin-orbit coupled states.

| Dy               |                   |         |
|------------------|-------------------|---------|
| SPIN-FREE STATES | SPIN-ORBIT STATES |         |
| 0.0              | 0.0               | 9765.5  |
| 9.1              | 152.1             | 9826.6  |
| 216.4            | 201.1             | 9912.3  |
| 231.7            | 235.2             | 11023.7 |
| 248.0            | 289.3             | 11142.9 |
| 305.3            | 325.5             | 11279.8 |
| 343.2            | 391.0             | 11845.4 |
| 438.1            | 485.9             | 11857.1 |
| 455.3            | 3077.2            | 11888.1 |
| 536.0            | 3139.7            | 11898.8 |
| 548.8            | 3175.6            | 11930.3 |
| 7654.4           | 3226.3            | 13624.6 |
| 7683.5           | 3269.8            | 13646.8 |
| 7719.7           | 3327.5            | 13676.2 |
| 7794.2           | 3403.6            | 13699.2 |
| 7813.9           | 5668.0            | 15030.8 |
| 7824.3           | 5733.1            | 15041.4 |
| 7846.1           | 5760.7            | 15066.5 |
| 34849.4          | 5822.1            | 16028.4 |
| 35038.2          | 5883.1            | 16044.6 |
| 35348.6          | 5954.8            | 16632.2 |
|                  | 7863.3            | 38855.0 |
|                  | 7915.3            | 38942.6 |
|                  | 7961.0            | 39009.0 |
|                  | 8042.7            | 39107.4 |
|                  | 8112.3            | 40248.7 |
|                  | 9599.3            | 40367.7 |
|                  | 9643.5            | 40560.4 |
|                  | 9654.5            | 41367.3 |
|                  | 9684.1            | 41422.3 |
|                  | 9697.3            |         |
|                  | 9726.8            |         |
|                  | 9749.9            |         |

**Table S12.** RASSI-SO computed low-lying 35 quartets (in red) and 112 doublet states (in black) along with spin-orbit coupled states (in blue, Kramer doublets) for Er centre in **4**. All the values are reported here in  $\text{cm}^{-1}$ .

| <b>Er</b> |         |         |          |
|-----------|---------|---------|----------|
| 0.0       | 18115.4 | 33358.7 | 50340.6  |
| 53.2      | 18116.8 | 33400.3 | 50352.3  |
| 99.0      | 18146.0 | 33405.0 | 50379.2  |
| 150.7     | 18151.0 | 43876.5 | 50381.8  |
| 151.7     | 18154.5 | 43894.5 | 51439.7  |
| 206.0     | 18157.9 | 43933.5 | 51458.3  |
| 270.5     | 18165.7 | 43977.6 | 51599.4  |
| 286.3     | 18171.7 | 43999.4 | 51724.0  |
| 308.1     | 18181.8 | 44041.7 | 51746.4  |
| 330.5     | 18188.7 | 44045.7 | 60769.0  |
| 371.0     | 18191.8 | 44101.1 | 60800.5  |
| 433.0     | 23977.2 | 44104.4 | 60849.0  |
| 438.5     | 23977.9 | 44116.1 | 60873.5  |
| 18300.8   | 24054.3 | 44117.1 | 60893.4  |
| 18337.3   | 24062.0 | 44171.8 | 60913.5  |
| 18376.5   | 24069.4 | 44171.9 | 60939.3  |
| 18388.0   | 24100.1 | 44602.4 | 77207.1  |
| 18425.1   | 24112.6 | 44602.4 | 77216.6  |
| 18467.3   | 24162.9 | 44721.3 | 77294.6  |
| 18531.4   | 24165.9 | 44721.7 | 77320.9  |
| 18563.7   | 27020.8 | 44837.8 | 77350.9  |
| 28676.2   | 27021.0 | 44841.0 | 77399.9  |
| 28718.7   | 27106.5 | 44942.0 | 77411.2  |
| 28763.3   | 27106.7 | 44948.4 | 77496.8  |
| 28785.8   | 27181.1 | 44998.8 | 77500.8  |
| 28841.7   | 27184.1 | 45036.3 | 110456.9 |
| 28853.2   | 27235.8 | 45045.7 | 110512.0 |
| 28876.7   | 27244.5 | 45112.4 | 110717.1 |
| 28927.0   | 27270.4 | 45114.5 | 110821.3 |
| 28954.3   | 27277.0 | 45206.8 | 110901.0 |
| 46733.9   | 27285.5 | 45206.9 | 111088.0 |
| 46874.2   | 27351.4 | 45364.0 | 111096.1 |
| 47015.2   | 27351.6 | 45364.1 |          |
| 47193.5   | 27494.3 | 50204.1 |          |
| 47229.2   | 27494.3 | 50222.0 |          |
|           | 33115.5 | 50254.3 |          |
|           | 33118.0 | 50265.9 |          |
|           | 33152.6 | 50277.7 |          |
|           | 33228.9 | 50312.4 |          |
|           | 33321.2 | 50318.4 |          |

---

**SPIN-ORBIT STATES**

---

|         |         |         |          |
|---------|---------|---------|----------|
| 0.0     | 27903.5 | 42199.7 | 61058.8  |
| 42.4    | 27937.6 | 49456.6 | 61115.5  |
| 96.4    | 27975.6 | 49479.0 | 61161.7  |
| 171.8   | 31987.6 | 49724.3 | 61170.1  |
| 180.3   | 32062.6 | 49809.0 | 61206.1  |
| 223.2   | 32139.0 | 49881.4 | 61241.3  |
| 252.3   | 32195.4 | 50013.0 | 61291.2  |
| 329.1   | 32232.3 | 50069.6 | 61306.6  |
| 6623.7  | 32253.4 | 50090.2 | 67055.9  |
| 6661.1  | 32319.4 | 50108.9 | 67212.3  |
| 6696.3  | 32470.2 | 50146.1 | 67304.0  |
| 6715.0  | 32790.0 | 50171.9 | 67357.2  |
| 6746.4  | 32829.3 | 50211.2 | 67396.3  |
| 6766.9  | 32855.7 | 50220.6 | 67435.1  |
| 6815.0  | 32872.1 | 50323.6 | 76155.1  |
| 10676.5 | 32881.9 | 50410.5 | 76196.2  |
| 10706.7 | 32925.2 | 50481.1 | 76227.4  |
| 10728.9 | 33266.4 | 50556.3 | 83199.8  |
| 10749.0 | 33296.7 | 50627.6 | 83280.6  |
| 10769.9 | 33310.7 | 50714.0 | 83328.1  |
| 10806.5 | 33329.2 | 50868.4 | 83415.6  |
| 13426.4 | 33985.0 | 51447.2 | 87135.5  |
| 13463.9 | 34010.9 | 51603.3 | 87228.6  |
| 13554.1 | 34015.8 | 51713.7 | 87287.6  |
| 13586.0 | 34028.6 | 51835.9 | 87351.1  |
| 13633.0 | 34041.9 | 51950.8 | 87443.5  |
| 19023.8 | 37535.7 | 52018.0 | 116542.5 |
| 19064.1 | 37621.7 | 52074.3 | 116816.2 |
| 19107.7 | 37686.1 | 52118.6 | 117048.4 |
| 19140.2 | 37749.4 | 52162.0 | 120963.9 |
| 19193.0 | 37767.0 | 52190.0 | 121212.4 |
| 22701.9 | 37836.7 | 52238.4 | 121401.8 |
| 22723.2 | 37850.3 | 54715.2 | 121603.4 |
| 22734.3 | 37961.5 | 54761.5 |          |
| 22745.6 | 37987.1 | 56235.6 |          |
| 22751.9 | 40444.1 | 56369.5 |          |
| 22776.0 | 40671.4 | 56487.5 |          |
| 23630.4 | 40701.3 | 56579.8 |          |
| 23688.2 | 40736.3 | 56649.3 |          |
| 25187.4 | 40767.1 | 56732.2 |          |
| 25237.5 | 40797.9 | 56833.4 |          |
| 25288.7 | 40830.8 | 56977.6 |          |
| 25342.6 | 40866.0 | 58633.8 |          |
| 27297.2 | 40943.0 | 58678.0 |          |

---

|         |         |         |
|---------|---------|---------|
| 27323.6 | 40991.0 | 58709.2 |
| 27358.5 | 41336.2 | 58733.7 |
| 27588.4 | 41368.2 | 58760.6 |
| 27689.3 | 41390.3 | 59392.6 |
| 27825.0 | 42051.8 | 61033.5 |
| 27840.1 | 42128.9 | 61058.8 |

**Table S13.** SINGLE\_ANISO computed g-tensors, and the tunnel splitting from ground state  $g_{zz}$  orientation for Tb centre in **2**.

| <b>Tb</b>                                    |          |          |          |                                        |
|----------------------------------------------|----------|----------|----------|----------------------------------------|
| Pseudo-KDs<br>Energy<br>( $\text{cm}^{-1}$ ) | $g_{xx}$ | $g_{yy}$ | $g_{zz}$ | $\Delta_{\text{tun}} (\text{cm}^{-1})$ |
| 0.0                                          | 0.0002   | 0.0005   | 17.6265  | 0.3                                    |
| 0.3                                          |          |          |          |                                        |
| 34.7                                         | 0.0003   | 0.0005   | 16.4244  | 0.9                                    |
| 35.7                                         |          |          |          |                                        |
| 116.8                                        | 0.0005   | 0.0014   | 8.2102   | 4.6                                    |
| 121.4                                        |          |          |          |                                        |
| 181.1                                        | 0.0000   | 0.0002   | 9.8936   | 16.7                                   |
| 197.8                                        |          |          |          |                                        |
| -                                            |          |          |          |                                        |
| 296.1                                        | 0.0001   | 0.0006   | 14.3596  | 4.4                                    |
| 300.5                                        |          |          |          |                                        |

**Table S14.** SINGLE\_ANISO computed g-tensors, the angle of deviation from ground state  $g_{zz}$  orientation and relative energies of eight low-lying Kramers' doublets for Dy centre in complex **3**.

| <b>Dy</b>                      |          |          |          |                              |
|--------------------------------|----------|----------|----------|------------------------------|
| KDs Energy( $\text{cm}^{-1}$ ) | $g_{xx}$ | $g_{yy}$ | $g_{zz}$ | $\theta$ ( $^{\circ}$ angle) |
| 0.0                            | 0.0298   | 0.0440   | 19.5632  | 0.0                          |
| 152.1                          | 0.9274   | 1.7941   | 16.2973  | 39.0                         |
| 201.1                          | 10.2639  | 6.9153   | 3.1207   | 59.0                         |
| 235.2                          | 0.9086   | 2.0811   | 10.8589  | 72.5                         |
| 289.3                          | 1.6572   | 4.0687   | 11.1803  | 62.5                         |
| 325.5                          | 1.9910   | 5.3975   | 12.1462  | 72.0                         |

|       |        |        |         |      |
|-------|--------|--------|---------|------|
| 391.0 | 0.0871 | 0.2387 | 18.1467 | 65.9 |
| 485.9 | 0.0179 | 0.0341 | 19.8171 | 88.0 |

**Table S15.** SINGLE\_ANISO computed g-tensors, the angle of deviation from ground state  $g_{zz}$  orientation and relative energies of eight low-lying Kramers doublets for Er centre in **4**.

| Er                                |          |          |          |                    |
|-----------------------------------|----------|----------|----------|--------------------|
| KDs Energy<br>(cm <sup>-1</sup> ) | $g_{xx}$ | $g_{yy}$ | $g_{zz}$ | $\theta$ (° angle) |
| 0.0                               | 0.9655   | 1.9316   | 15.0560  | 0.0                |
| 42.4                              | 1.3515   | 3.3578   | 12.7371  | 110.4              |
| 96.4                              | 0.2539   | 3.5666   | 9.7213   | 72.6               |
| 171.8                             | 5.3683   | 4.2753   | 0.0387   | 98.0               |
| 180.3                             | 1.1524   | 2.4267   | 12.4983  | 43.2               |
| 223.2                             | 0.4572   | 3.2031   | 11.5457  | 66.9               |
| 252.3                             | 0.1223   | 3.1282   | 11.6367  | 65.3               |
| 329.1                             | 0.1408   | 0.3750   | 15.8410  | 79.4               |

**Table S16.** SINGLE\_ANISO computed crystal field parameters for the Tb centre in **2**; Dy centre in **3** and Er centre in **4** respectively. The major dominating values are kept in bold.

| k | q        | $B_k^q$          | $B_k^q$          | $B_k^q$          |
|---|----------|------------------|------------------|------------------|
|   |          | Tb               | Dy               | Er               |
| 2 | -2       | -0.39E+00        | 1.20E+00         | 6.80E-01         |
|   | -1       | -0.38E+01        | 2.50E+00         | 1.30E+00         |
|   | 0        | <b>-0.24E+01</b> | <b>-3.70E+00</b> | <b>-6.50E-01</b> |
|   | 1        | 0.17E+01         | 3.90E+00         | 5.10E-01         |
|   | 2        | 0.30E+01         | 5.30E+00         | 3.80E-01         |
| 4 | -4       | 0.38E-02         | 2.10E-02         | 1.50E-03         |
|   | -3       | -0.24E-01        | -2.90E-01        | 2.90E-03         |
|   | -2       | -0.73E-02        | -6.90E-03        | -2.00E-03        |
|   | -1       | 0.47E-01         | -4.20E-02        | -7.50E-03        |
|   | 0        | -0.80E-03        | -1.90E-02        | -9.40E-04        |
|   | 1        | -0.72E-02        | 4.10E-02         | -3.00E-03        |
|   | 2        | 0.79E-02         | -1.30E-02        | 4.50E-03         |
|   | 3        | 0.31E-01         | 5.20E-02         | -1.10E-02        |
| 4 | 0.16E-02 | 4.30E-02         | -9.40E-03        |                  |
| 6 | -6       | 0.15E-03         | 1.80E-03         | 2.10E-04         |
|   | -5       | -0.25E-03        | -3.10E-03        | 5.50E-04         |
|   | -4       | -0.81E-04        | -1.00E-03        | 9.30E-06         |
|   | -3       | 0.45E-04         | -7.20E-03        | 2.00E-04         |
|   | -2       | 0.76E-04         | 5.00E-04         | 2.80E-04         |
|   | -1       | 0.13E-03         | -3.20E-03        | 2.00E-04         |
|   | 0        | -0.12E-04        | -7.80E-04        | -3.00E-05        |

|  |   |           |           |           |
|--|---|-----------|-----------|-----------|
|  | 1 | -0.19E-03 | -2.70E-03 | 2.00E-04  |
|  | 2 | -0.30E-03 | 2.90E-03  | -6.50E-05 |
|  | 3 | -0.13E-03 | 1.50E-03  | -4.70E-04 |
|  | 4 | 0.21E-03  | 3.40E-03  | 1.10E-04  |
|  | 5 | -0.37E-03 | -6.20E-03 | 9.10E-04  |
|  | 6 | -0.52E-04 | -1.30E-03 | 4.20E-04  |

**Table S17.** SINGLE\_ANISO computed wave function decomposition analysis for Tb centre in **2**. The major dominating values are kept in bold.

| $\pm mJ$ | wave function decomposition analysis <b>Tb</b>                                                                        |
|----------|-----------------------------------------------------------------------------------------------------------------------|
| 1        | <b>95.9%</b> $ \pm 6\rangle + 3.4\%  \pm 4\rangle$                                                                    |
| 2        | <b>33.4%</b> $ \pm 5\rangle + 27.3\%  \pm 4\rangle + 23.5\%  \pm 3\rangle + 10.2\%  \pm 2\rangle$                     |
| 3        | <b>57.6%</b> $ \pm 5\rangle + 16.1\%  \pm 2\rangle + 8.9\%  \pm 4\rangle + 8.0\%  \pm 1\rangle + 6.4\%  \pm 3\rangle$ |
| 4        | <b>44.2%</b> $ \pm 4\rangle + 24.4\%  \pm 1\rangle + 11.7\%  \pm 3\rangle + 8.0\%  0\rangle + 7.9\%  \pm 2\rangle$    |
| 5        | <b>40.5%</b> $ \pm 3\rangle + 21.3\%  0\rangle + 17.8\%  \pm 1\rangle + 14.0\%  \pm 2\rangle$                         |
| 6        | <b>41.0%</b> $ \pm 2\rangle + 20.5\%  \pm 1\rangle + 17.4\%  0\rangle + 10.3\%  \pm 3\rangle + 9.0\%  \pm 4\rangle$   |
| 7        | <b>52.6%</b> $ \pm 1\rangle + 21.4\%  \pm 2\rangle + 14.9\%  \pm 3\rangle + 9.0\%  \pm 4\rangle$                      |

**Table S18.** SINGLE\_ANISO computed wave function decomposition analysis for Dy centre in **3**. The major dominating values are kept in bold.

| $\pm mJ$ | wave function decomposition analysis <b>Dy</b>                                                                                       |
|----------|--------------------------------------------------------------------------------------------------------------------------------------|
| KD1      | <b>94.1%</b> $ \pm 15/2\rangle + 3.0\%  \pm 9/2\rangle$                                                                              |
| KD2      | <b>40.3%</b> $ \pm 13/2\rangle + 24.6\%  \pm 7/2\rangle + 13.7\%  \pm 9/2\rangle + 10.1\%  \pm 11/2\rangle + 5.0\%  \pm 3/2\rangle$  |
| KD3      | <b>31.2%</b> $ \pm 5/2\rangle + 19.4\%  \pm 13/2\rangle + 16.9\%  \pm 1/2\rangle + 13.6\%  \pm 11/2\rangle + 9.2\%  \pm 3/2\rangle$  |
| KD4      | <b>24.7%</b> $ \pm 3/2\rangle + 17.5\%  \pm 11/2\rangle + 15.5\%  \pm 9/2\rangle + 13.3\%  \pm 1/2\rangle + 9.2\%  \pm 7/2\rangle$   |
| KD5      | <b>23.7%</b> $ \pm 5/2\rangle + 20.0\%  \pm 9/2\rangle + 16.9\%  \pm 11/2\rangle + 12.9\%  \pm 5/2\rangle + 11.5\%  \pm 13/2\rangle$ |
| KD6      | <b>39.2%</b> $ \pm 3/2\rangle + 28.0\%  \pm 1/2\rangle + 15.3\%  \pm 5/2\rangle + 7.3\%  \pm 11/2\rangle + 5.8\%  \pm 9/2\rangle$    |
| KD7      | <b>26.6%</b> $ \pm 7/2\rangle + 23.4\%  \pm 9/2\rangle + 18.3\%  \pm 1/2\rangle + 12.8\%  \pm 11/2\rangle + 11.8\%  \pm 5/2\rangle$  |
| KD8      | <b>45.4%</b> $ \pm 1/2\rangle + 31.0\%  \pm 3/2\rangle + 14.8\%  \pm 5/2\rangle + 5.3\%  \pm 7/2\rangle$                             |

**Table S19.** SINGLE\_ANISO computed wave function decomposition analysis for Er centre in **4**. The major dominating values are kept in bold.

| $\pm mJ$ | wave function decomposition analysis Er                                                                                                                                                                             |
|----------|---------------------------------------------------------------------------------------------------------------------------------------------------------------------------------------------------------------------|
| KD1      | <b>67.8%</b> $ \pm 15/2\rangle$ + 11.3% $ \pm 9/2\rangle$ + 7.5% $ \pm 11/2\rangle$ + 4.4% $ \pm 13/2\rangle$                                                                                                       |
| KD2      | <b>32.5%</b> $ \pm 7/2\rangle$ + 27.3% $ \pm 5/2\rangle$ + 9.7% $ \pm 3/2\rangle$ + 9.1% $ \pm 1/2\rangle$ + 7.3% $ \pm 11/2\rangle$                                                                                |
| KD3      | <b>26.2%</b> $ \pm 9/2\rangle$ + 21.7% $ \pm 3/2\rangle$ + 13.8% $ \pm 1/2\rangle$ + 11.5% $ \pm 7/2\rangle$ + 10.6% $ \pm 13/2\rangle$                                                                             |
| KD4      | <b>33.1%</b> $ \pm 13/2\rangle$ + 13.5% $ \pm 9/2\rangle$ + 13.0% $ \pm 3/2\rangle$ + 10.9% $ \pm 11/2\rangle$ + 9.3% $ \pm 5/2\rangle$ + 7.4% $ \pm 1/2\rangle$ + 6.9% $ \pm 15/2\rangle$ + 5.9% $ \pm 7/2\rangle$ |
| KD5      | <b>34.0%</b> $ \pm 11/2\rangle$ + 23.8% $ \pm 13/2\rangle$ + 10.2% $ \pm 15/2\rangle$ + 10.2% $ \pm 5/2\rangle$ + 7.7% $ \pm 9/2\rangle$ + 7.7% $ \pm 1/2\rangle$                                                   |
| KD6      | <b>22.6%</b> $ \pm 9/2\rangle$ + 20.3% $ \pm 7/2\rangle$ + 13.0% $ \pm 5/2\rangle$ + 12.4% $ \pm 3/2\rangle$ + 12.3% $ \pm 11/2\rangle$ + 11.1% $ \pm 13/2\rangle$                                                  |
| KD7      | <b>32.3%</b> $ \pm 7/2\rangle$ + 24.0% $ \pm 9/2\rangle$ + 23.4% $ \pm 5/2\rangle$ + 15.3% $ \pm 1/2\rangle$                                                                                                        |
| KD8      | <b>39.5%</b> $ \pm 1/2\rangle$ + 34.0% $ \pm 3/2\rangle$ + 12.0% $ \pm 5/2\rangle$ + 5.0% $ \pm 13/2\rangle$                                                                                                        |

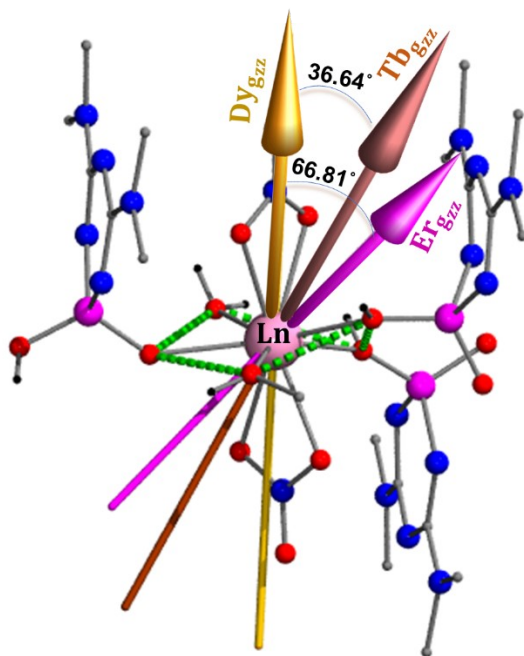

**Figure S11.** Comparison of computed ground state  $g_{zz}$  orientations in **2-4**. The angle shows the relative orientations of ground state  $g_{zz}$  on  $Tb^{III}$ ,  $Dy^{III}$  and  $Er^{III}$  ions in **2-4**.



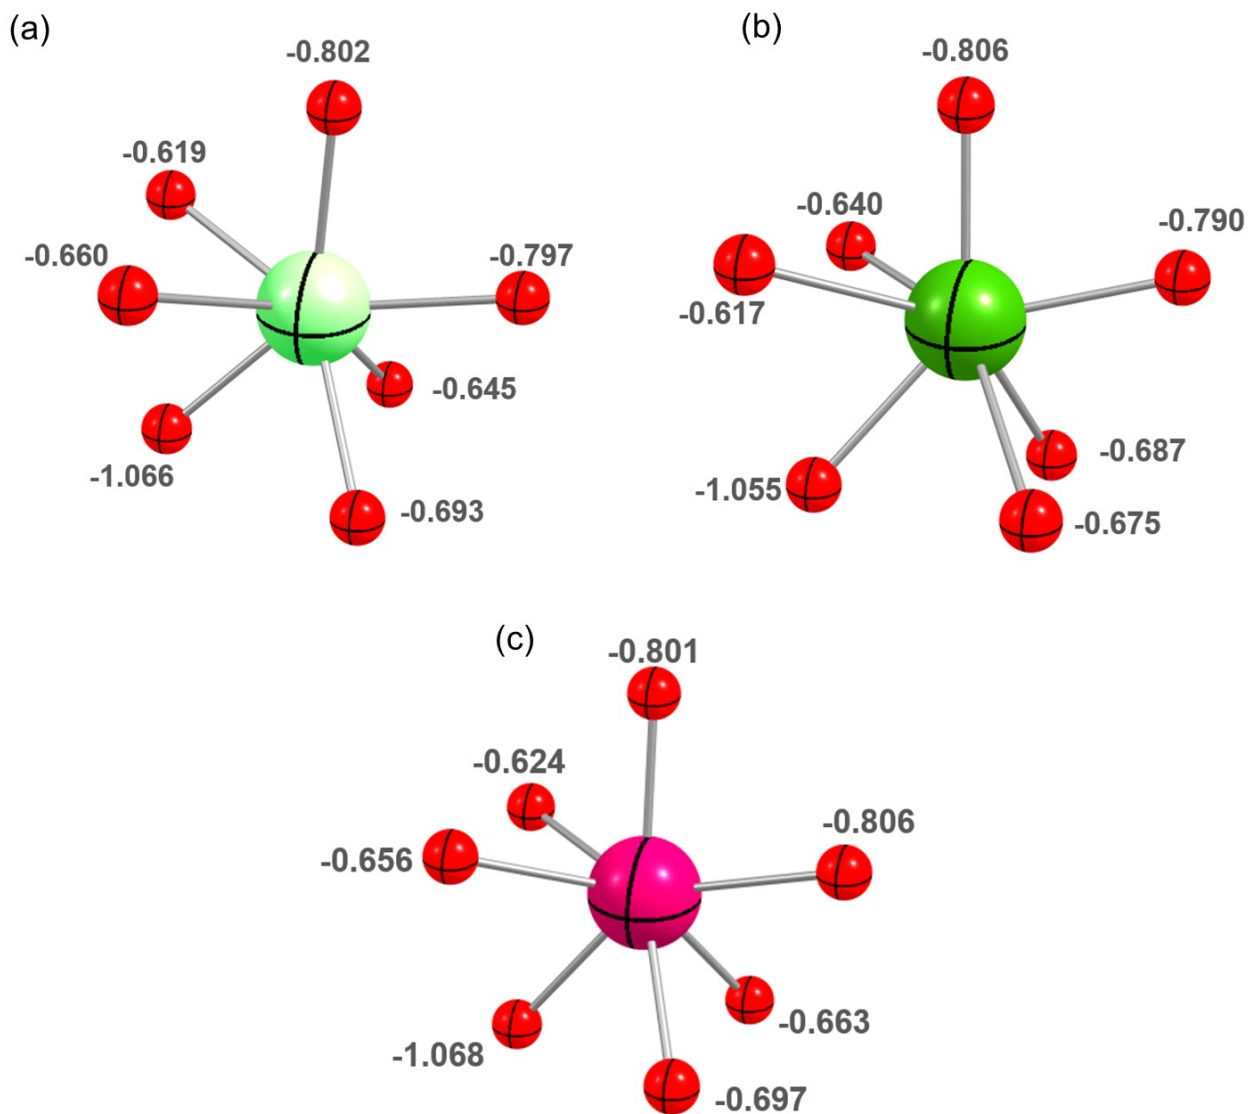

**Figure S12.** CASSCF computed LoProp charges on the first coordinating atoms of (a) Tb, (b) Dy and (c) Er in complexes 2-4.

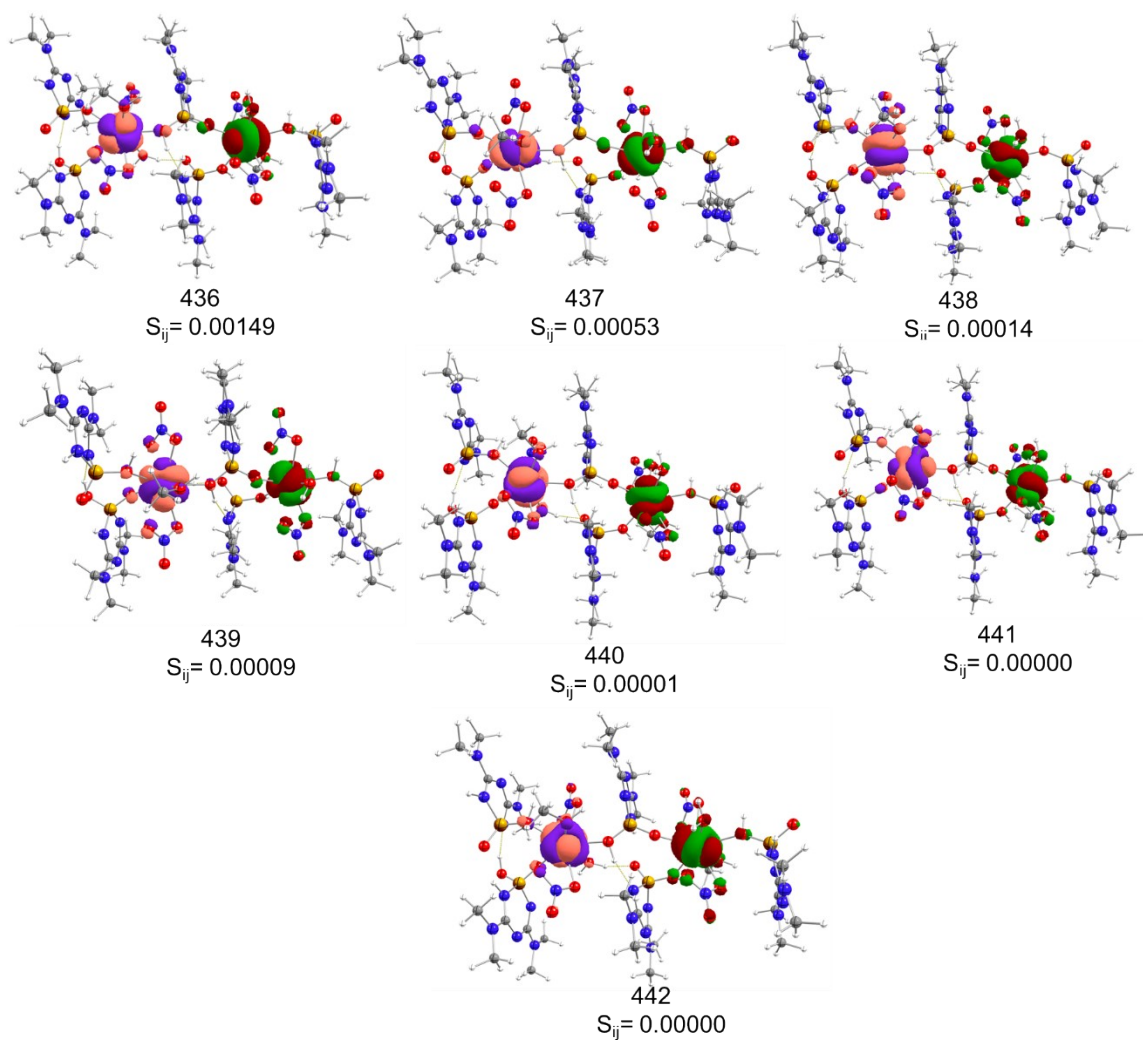

**Figure S13.** DFT computed overlap integral between the seven 4f-orbitals of Gd<sup>III</sup> centres in Gd-dimer obtained from **1**. The orbitals were constructed using the contour value of 0.03 e<sup>-</sup>/bohr<sup>3</sup>.

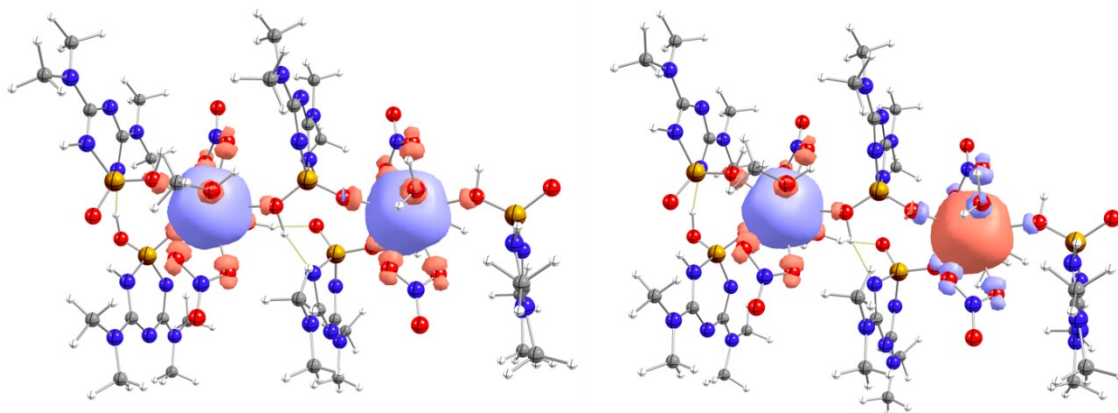

**Figure S14.** DFT computed spin-density plot for S=7 state of Gd<sup>III</sup> centres. The iso-density surface here is constructed with a contour value of 0.0005e<sup>-</sup>/bohr<sup>3</sup>. The purple and orange colour represents the positive and negative spin densities respectively.

**Table S20.** BS-DFT computed energies of high-spin and broken-symmetry solution of Gd<sub>2</sub> using H= -2JS<sub>1</sub>S<sub>2</sub> formalism.

| Solution | Energy (E <sub>n</sub> ) | ρ <sup>Gd1</sup> | ρ <sup>Gd2</sup> | <S <sup>**2</sup> > | J (cm <sup>-1</sup> ) |
|----------|--------------------------|------------------|------------------|---------------------|-----------------------|
| HS       | -29049.398021413388      | 7.0202           | 7.0217           | 56.0122             | -0.00049              |
| BS       | -29049.398021464465      | 7.0202           | -7.0217          | 7.0122              |                       |

*J* values are estimated using the following equation,

$$J = - \frac{E_{HS} - E_{BS}}{\langle S^{**2} \rangle_{HS} - \langle S^{**2} \rangle_{BS}}$$

**Table S21.** DFT computed overlap integral values for the seven corresponding orbitals between Gd<sup>III</sup> centres in **1**.

| Corresponding Orbital 4f-orbitals | Overlap Integral value (S <sub>ab</sub> ) |
|-----------------------------------|-------------------------------------------|
| 436                               | 0.00149                                   |
| 437                               | 0.00053                                   |
| 438                               | 0.00014                                   |
| 439                               | 0.00009                                   |
| 440                               | 0.00001                                   |
| 441                               | 0.00000                                   |
| 442                               | 0.00000                                   |

**Table S22.** Hydrogen optimized cartesian coordinates of monomeric complexes **2-4** and dimeric complex **1** respectively.

| Monomeric complex <b>2</b> |                 |                 |                 |
|----------------------------|-----------------|-----------------|-----------------|
| Tb                         | 0.000000000000  | 0.000000000000  | 0.000000000000  |
| P                          | -0.102791000000 | -3.662325000000 | -0.531056000000 |
| P                          | -1.387522000000 | 3.281525000000  | 1.222042000000  |
| P                          | 1.586260000000  | 3.054738000000  | -0.858318000000 |
| O                          | -0.084769000000 | -2.412016000000 | 0.298561000000  |
| O                          | -0.349529000000 | -4.918746000000 | 0.229606000000  |
| O                          | -1.405544000000 | 4.531834000000  | 0.392425000000  |
| O                          | 1.680469000000  | 3.767594000000  | 0.438094000000  |
| O                          | 1.166476000000  | 0.793404000000  | 2.082706000000  |

|   |                 |                 |                 |
|---|-----------------|-----------------|-----------------|
| O | 2.262508000000  | -0.930198000000 | 0.103792000000  |
| O | 1.457622000000  | 1.569449000000  | -0.826910000000 |
| O | -1.140784000000 | 2.025104000000  | 0.461379000000  |
| O | 0.440550000000  | -0.885480000000 | -2.229461000000 |
| O | -2.271430000000 | -0.670220000000 | -0.085200000000 |
| O | -0.978988000000 | 0.740492000000  | -2.230724000000 |
| O | -0.622890000000 | -0.378718000000 | 2.363938000000  |
| O | 0.463467000000  | 0.376773000000  | 4.098083000000  |
| O | -0.360460000000 | -0.155126000000 | -4.125522000000 |
| N | -1.213716000000 | -3.527059000000 | -1.775301000000 |
| N | 0.298120000000  | -3.647882000000 | -3.603852000000 |
| N | 1.293516000000  | -3.768705000000 | -1.444610000000 |
| N | 2.565629000000  | -3.560390000000 | -3.359263000000 |
| N | -1.957481000000 | -3.497895000000 | -3.948623000000 |
| N | 0.337364000000  | 0.255950000000  | 2.874777000000  |
| N | -0.276598000000 | 3.416791000000  | 2.466287000000  |
| N | -1.788433000000 | 3.295968000000  | 4.294838000000  |
| N | -2.783829000000 | 3.175145000000  | 2.135595000000  |
| N | 2.877626000000  | 3.454288000000  | -1.857433000000 |
| N | -0.303733000000 | -0.096797000000 | -2.896259000000 |
| N | 0.373831000000  | 3.730653000000  | -1.791908000000 |
| N | 1.532145000000  | 3.458454000000  | -3.834903000000 |
| N | -4.055942000000 | 3.383460000000  | 4.050249000000  |
| N | 0.467168000000  | 3.445955000000  | 4.639609000000  |
| N | 3.823352000000  | 3.602886000000  | -3.956746000000 |
| N | -0.764730000000 | 3.666769000000  | -3.797718000000 |
| C | -0.932499000000 | -3.564556000000 | -3.104024000000 |
| C | 1.353639000000  | -3.645105000000 | -2.804380000000 |
| C | 2.724768000000  | -3.413180000000 | -4.802609000000 |
| C | -1.727282000000 | -3.595109000000 | -5.391066000000 |
| C | 3.767375000000  | -3.575666000000 | -2.549863000000 |
| C | -3.343820000000 | -3.486785000000 | -3.484897000000 |
| C | -0.557815000000 | 3.379294000000  | 3.795010000000  |
| C | 0.392445000000  | 3.609830000000  | -3.150956000000 |
| C | -2.843952000000 | 3.298745000000  | 3.495366000000  |
| C | 2.719343000000  | 3.507061000000  | -3.219550000000 |
| C | -2.053145000000 | 3.684823000000  | -3.094999000000 |
| C | 3.741433000000  | 3.705655000000  | -5.407312000000 |
| C | 3.524032000000  | -0.249562000000 | 0.210111000000  |
| C | -4.215082000000 | 3.530670000000  | 5.493594000000  |
| C | 0.236968000000  | 3.348741000000  | 6.082052000000  |
| C | -0.830724000000 | 3.663992000000  | -5.261100000000 |
| C | 5.158337000000  | 3.587610000000  | -3.353126000000 |
| C | -5.257688000000 | 3.368184000000  | 3.240849000000  |
| C | 1.853507000000  | 3.457065000000  | 4.175882000000  |
| H | 0.416169000000  | -5.304685000000 | 0.273289000000  |

|   |                 |                 |                 |
|---|-----------------|-----------------|-----------------|
| H | -2.038864000000 | -3.422901000000 | -1.553456000000 |
| H | 3.074835000000  | -4.228388000000 | -5.170846000000 |
| H | 3.332702000000  | -2.693797000000 | -4.986727000000 |
| H | 1.872712000000  | -3.222919000000 | -5.201533000000 |
| H | -0.928335000000 | -3.111817000000 | -5.620312000000 |
| H | -2.474292000000 | -3.217363000000 | -5.860388000000 |
| H | -1.624808000000 | -4.517252000000 | -5.638363000000 |
| H | 3.742016000000  | -2.847951000000 | -1.925304000000 |
| H | 4.537035000000  | -3.485396000000 | -3.116660000000 |
| H | 3.819283000000  | -4.406151000000 | -2.069711000000 |
| H | -3.496874000000 | -4.242276000000 | -2.912685000000 |
| H | -3.935240000000 | -3.534003000000 | -4.241227000000 |
| H | -3.511578000000 | -2.677132000000 | -2.997524000000 |
| H | 2.329755000000  | -1.711937000000 | 0.453798000000  |
| H | 2.231869000000  | 1.239199000000  | -0.954168000000 |
| H | -1.906483000000 | 1.639165000000  | 0.417696000000  |
| H | -2.791481000000 | -0.000972000000 | 0.101806000000  |
| H | -2.441858000000 | -1.245310000000 | 0.542247000000  |
| H | 0.548551000000  | 3.520949000000  | 2.244442000000  |
| H | 3.644836000000  | 3.629273000000  | -1.511939000000 |
| H | -2.023842000000 | 3.075153000000  | -2.354914000000 |
| H | -2.751255000000 | 3.422346000000  | -3.699702000000 |
| H | -2.227729000000 | 4.572247000000  | -2.771889000000 |
| H | 3.835283000000  | 2.833507000000  | -5.795405000000 |
| H | 4.445095000000  | 4.276439000000  | -5.728617000000 |
| H | 2.891397000000  | 4.076457000000  | -5.654609000000 |
| H | 3.725575000000  | 0.183734000000  | -0.622033000000 |
| H | 4.213885000000  | -0.885619000000 | 0.415891000000  |
| H | 3.475741000000  | 0.405937000000  | 0.910484000000  |
| H | -4.565148000000 | 2.715462000000  | 5.861832000000  |
| H | -4.823015000000 | 4.250053000000  | 5.677713000000  |
| H | -3.363026000000 | 3.720931000000  | 5.892518000000  |
| H | -0.561978000000 | 3.832033000000  | 6.311298000000  |
| H | 0.983979000000  | 3.726487000000  | 6.551374000000  |
| H | 0.134495000000  | 2.426598000000  | 6.329349000000  |
| H | 0.058060000000  | 3.697322000000  | -5.622117000000 |
| H | -1.325730000000 | 4.430593000000  | -5.560744000000 |
| H | -1.268787000000 | 2.862672000000  | -5.560744000000 |
| H | 5.240051000000  | 4.318103000000  | -2.735787000000 |
| H | 5.822520000000  | 3.675102000000  | -4.042668000000 |
| H | 5.289798000000  | 2.758514000000  | -2.887414000000 |
| H | -5.232329000000 | 4.095899000000  | 2.616289000000  |
| H | -6.027348000000 | 3.458454000000  | 3.807645000000  |
| H | -5.309596000000 | 2.537699000000  | 2.760696000000  |
| H | 2.006561000000  | 2.701574000000  | 3.603671000000  |
| H | 2.444927000000  | 3.409847000000  | 4.932213000000  |

|   |                |                |                |
|---|----------------|----------------|----------------|
| H | 2.021265000000 | 4.266718000000 | 3.688510000000 |
|---|----------------|----------------|----------------|

Monomeric complex 3

|    |                 |                 |                 |
|----|-----------------|-----------------|-----------------|
| Dy | 0.000000000000  | 0.000000000000  | 0.000000000000  |
| P  | -3.284534250000 | -1.436413470000 | 0.862992350000  |
| P  | 2.244886520000  | 2.698208450000  | -1.340521350000 |
| P  | 3.508922930000  | -0.254799930000 | 0.374838410000  |
| O  | -2.253380260000 | -0.879839400000 | -0.078074350000 |
| O  | -4.621461010000 | -1.659437340000 | 0.249502100000  |
| O  | 4.026825840000  | 0.049510570000  | -0.963957410000 |
| O  | 3.475969880000  | 3.171934320000  | -0.620325090000 |
| O  | -1.488555320000 | 1.787406040000  | 0.384984490000  |
| O  | 1.316092300000  | 1.889453810000  | -0.505811750000 |
| O  | 0.901319810000  | -0.569181490000 | -2.254150930000 |
| O  | 2.112994790000  | -0.748225910000 | 0.477555870000  |
| O  | -0.330387360000 | -0.925379800000 | 2.218932540000  |
| O  | -0.912282940000 | 0.598108820000  | -2.213174090000 |
| O  | 0.039389490000  | -2.417702290000 | -0.297663210000 |
| O  | 0.579943070000  | 1.036071980000  | 2.238462230000  |
| O  | -0.017108880000 | 0.027284100000  | -4.128935860000 |
| O  | 0.266031690000  | -0.055244530000 | 4.119976640000  |
| N  | -2.705142550000 | -2.015632390000 | 3.856082890000  |
| N  | -2.707492740000 | -2.802709370000 | 1.613999630000  |
| N  | -1.758496210000 | -4.033918560000 | 3.325874060000  |
| N  | -3.438715070000 | -0.462776060000 | 2.210448290000  |
| N  | -3.433267190000 | 0.064933370000  | 4.446179860000  |
| N  | 0.000000000000  | 0.000000000000  | -2.909319880000 |
| N  | 4.505777750000  | -1.345426000000 | 1.185311690000  |
| N  | 3.745405950000  | 1.057831610000  | 1.387638070000  |
| N  | 1.703931870000  | 3.294930220000  | -4.337364630000 |
| N  | 1.473127820000  | 3.975832590000  | -2.072516360000 |
| N  | 0.189411080000  | 0.000000000000  | 2.890139190000  |
| N  | 4.220140230000  | -0.266250630000 | 3.293153570000  |
| N  | 3.478376480000  | 1.917922190000  | 3.508220840000  |
| N  | 0.887653480000  | 5.372571600000  | -3.819783840000 |
| N  | 2.658147320000  | 1.842552220000  | -2.713271930000 |
| N  | 5.284716100000  | -2.295008090000 | 3.140097410000  |
| N  | 2.697857060000  | 1.335393100000  | -4.953312690000 |
| C  | -3.192856490000 | -0.839496590000 | 3.487810880000  |
| C  | -2.402688350000 | -2.904154170000 | 2.950922460000  |
| C  | -4.042690200000 | 1.364487670000  | 4.171904800000  |
| C  | -1.375056720000 | -4.247552470000 | 4.709917230000  |
| C  | -1.379333410000 | -5.063924880000 | 2.389423500000  |
| C  | -3.270001270000 | -0.305687850000 | 5.858531330000  |
| C  | 3.804289270000  | 0.909019830000  | 2.749613610000  |
| C  | 4.668245850000  | -1.266979240000 | 2.542937680000  |

|   |                 |                 |                 |
|---|-----------------|-----------------|-----------------|
| C | 2.329435080000  | 2.181541870000  | -3.982545640000 |
| C | 5.521551340000  | -2.289391350000 | 4.577371710000  |
| C | 2.895546540000  | 3.153992560000  | 2.976336320000  |
| C | 1.378815400000  | 4.173132150000  | -3.429990520000 |
| C | 3.638854450000  | 1.867903940000  | 4.965999180000  |
| C | 3.322327080000  | 0.042691910000  | -4.680507820000 |
| C | 5.722089130000  | -3.479048040000 | 2.394383900000  |
| C | 1.142894960000  | -3.300319590000 | -0.627780290000 |
| C | 0.752403090000  | 5.699240480000  | -5.228160190000 |
| C | 0.511016610000  | 6.403741190000  | -2.883680700000 |
| C | 2.298886290000  | 1.598691190000  | -6.342750660000 |
| H | -4.744931320000 | -1.462148390000 | -0.700515750000 |
| H | -2.470442170000 | -3.627902080000 | 1.054499320000  |
| H | -3.328214620000 | 2.188222000000  | 4.388196530000  |
| H | -4.939508210000 | 1.506297220000  | 4.810931730000  |
| H | -4.341996310000 | 1.401855840000  | 3.111054960000  |
| H | -1.761786480000 | -3.414234240000 | 5.318433480000  |
| H | -0.269197970000 | -4.282577310000 | 4.812227450000  |
| H | -1.798168280000 | -5.201470450000 | 5.088933370000  |
| H | -2.257096050000 | -5.551830330000 | 1.904717670000  |
| H | -0.835389710000 | -5.860390600000 | 2.927495720000  |
| H | -0.700375210000 | -4.682628400000 | 1.593151980000  |
| H | -4.181938790000 | -0.800626900000 | 6.258710490000  |
| H | -3.079730240000 | 0.611059480000  | 6.449316070000  |
| H | -2.411770200000 | -0.988319390000 | 5.974085180000  |
| H | -1.654876210000 | 2.595808070000  | -0.139262210000 |
| H | -2.338263010000 | 1.536210330000  | 0.813813810000  |
| H | 1.809987540000  | 1.899919920000  | 0.395040060000  |
| H | 1.920056600000  | -1.232321310000 | 1.320265990000  |
| H | -0.704202960000 | -2.578848290000 | -0.913344550000 |
| H | 5.035656610000  | -2.046443300000 | 0.659076120000  |
| H | 3.262761790000  | 1.022078470000  | -2.550589090000 |
| H | 5.200450540000  | -1.316148010000 | 4.980825130000  |
| H | 6.598885280000  | -2.444045830000 | 4.794968590000  |
| H | 4.941697440000  | -3.097706670000 | 5.072684130000  |
| H | 3.326363030000  | 4.016193400000  | 3.522594930000  |
| H | 1.795474830000  | 3.146625930000  | 3.125524100000  |
| H | 3.139702280000  | 3.252338630000  | 1.899968030000  |
| H | 2.650789220000  | 1.986720830000  | 5.458133230000  |
| H | 4.303261560000  | 2.690242310000  | 5.304951200000  |
| H | 4.070731550000  | 0.896834610000  | 5.255202110000  |
| H | 4.202860390000  | 0.142648540000  | -4.011012350000 |
| H | 3.685177280000  | -0.379361360000 | -5.634843080000 |
| H | 2.604839280000  | -0.673991570000 | -4.226534750000 |
| H | 4.906349990000  | -3.892419810000 | 1.762783080000  |
| H | 6.014737060000  | -4.264257160000 | 3.114389620000  |

|   |                 |                 |                 |
|---|-----------------|-----------------|-----------------|
| H | 6.606632860000  | -3.274282980000 | 1.750169440000  |
| H | 1.690525080000  | -2.929122310000 | -1.517489400000 |
| H | 0.774942220000  | -4.329315880000 | -0.814447640000 |
| H | 1.821259200000  | -3.331069790000 | 0.243706960000  |
| H | 1.003244980000  | 4.814639250000  | -5.835743420000 |
| H | 1.426627320000  | 6.539024010000  | -5.512502890000 |
| H | -0.290116520000 | 6.014307920000  | -5.458017270000 |
| H | -0.572087150000 | 6.648910210000  | -2.975396050000 |
| H | 1.084882230000  | 7.337588980000  | -3.076487590000 |
| H | 0.726971100000  | 6.044299830000  | -1.862344970000 |
| H | 1.324739300000  | 1.117696980000  | -6.578709420000 |
| H | 3.074139500000  | 1.199212590000  | -7.025259320000 |
| H | 2.196950040000  | 2.686128220000  | -6.491236180000 |

**Monomeric complex 4**

|    |                 |                 |                 |
|----|-----------------|-----------------|-----------------|
| Er | 0.000000000000  | 0.000000000000  | 0.000000000000  |
| P  | -1.561990000000 | 3.024620000000  | 0.883740000000  |
| P  | 1.372910000000  | 3.257420000000  | -1.227610000000 |
| P  | 0.124770000000  | -3.642430000000 | 0.538760000000  |
| O  | 1.406280000000  | 4.503950000000  | -0.393010000000 |
| O  | -1.665470000000 | 3.749100000000  | -0.408050000000 |
| O  | -1.433450000000 | 1.538530000000  | 0.840410000000  |
| O  | 1.120390000000  | 1.997920000000  | -0.474580000000 |
| O  | 0.576270000000  | -0.396330000000 | -2.334680000000 |
| O  | -0.398010000000 | -0.883460000000 | 2.197640000000  |
| O  | 0.996580000000  | 0.754570000000  | 2.187490000000  |
| O  | -1.180730000000 | 0.813910000000  | -2.027960000000 |
| O  | -2.210810000000 | -0.938660000000 | -0.105860000000 |
| O  | 2.239400000000  | -0.664040000000 | 0.060730000000  |
| O  | 0.415530000000  | -0.141030000000 | 4.084380000000  |
| O  | -0.521950000000 | 0.373690000000  | -4.062080000000 |
| O  | 0.091400000000  | -2.395900000000 | -0.295840000000 |
| O  | 0.377300000000  | -4.901930000000 | -0.214270000000 |
| N  | -0.346300000000 | 3.704940000000  | 1.810970000000  |
| N  | -0.381960000000 | 0.263300000000  | -2.842800000000 |
| N  | 2.766380000000  | 3.143300000000  | -2.140890000000 |
| N  | 0.263470000000  | 3.395830000000  | -2.470460000000 |
| N  | 0.337750000000  | -0.088590000000 | 2.853320000000  |
| N  | -2.850110000000 | 3.412390000000  | 1.896170000000  |
| N  | -1.507950000000 | 3.411010000000  | 3.866670000000  |
| N  | 1.785120000000  | 3.284050000000  | -4.301730000000 |
| N  | 0.796380000000  | 3.623520000000  | 3.826790000000  |
| N  | 4.052500000000  | 3.347530000000  | -4.053380000000 |
| N  | -0.470600000000 | 3.430330000000  | -4.644340000000 |
| N  | -3.788370000000 | 3.557290000000  | 3.995370000000  |
| N  | -1.268700000000 | -3.756560000000 | 1.452040000000  |



|   |                 |                 |                 |
|---|-----------------|-----------------|-----------------|
| N | 1.234210000000  | -3.504020000000 | 1.781610000000  |
| N | -0.287440000000 | -3.615800000000 | 3.612880000000  |
| N | -2.554810000000 | -3.552320000000 | 3.364530000000  |
| N | 1.968280000000  | -3.469520000000 | 3.955490000000  |
| C | -0.366920000000 | 3.566950000000  | 3.168750000000  |
| C | 0.537760000000  | 3.358570000000  | -3.799590000000 |
| C | -2.696240000000 | 3.463450000000  | 3.253950000000  |
| C | 2.829480000000  | 3.270250000000  | -3.507730000000 |
| C | -3.706290000000 | 3.651120000000  | 5.452850000000  |
| C | 2.074250000000  | 3.656640000000  | 3.119800000000  |
| C | 5.258370000000  | 3.330970000000  | -3.248500000000 |
| C | -3.507890000000 | -0.277650000000 | -0.204840000000 |
| C | 4.205150000000  | 3.495190000000  | -5.496350000000 |
| C | 0.865310000000  | 3.600070000000  | 5.286080000000  |
| C | -1.863630000000 | 3.448270000000  | -4.176650000000 |
| C | -5.133780000000 | 3.544870000000  | 3.398970000000  |
| C | -0.232190000000 | 3.322690000000  | -6.090940000000 |
| C | -1.331800000000 | -3.629600000000 | 2.818880000000  |
| C | 0.959920000000  | -3.541280000000 | 3.110740000000  |
| C | -3.760690000000 | -3.568880000000 | 2.559650000000  |
| C | -2.707470000000 | -3.404660000000 | 4.807500000000  |
| C | 3.361310000000  | -3.451580000000 | 3.487800000000  |
| C | 1.729870000000  | -3.577160000000 | 5.402090000000  |
| H | -2.231230000000 | 1.252740000000  | 0.706990000000  |
| H | 1.610380000000  | 1.974460000000  | 0.213910000000  |
| H | -2.295810000000 | -1.718340000000 | -0.453190000000 |
| H | 2.748080000000  | -0.016840000000 | -0.195780000000 |
| H | 2.377420000000  | -1.280890000000 | -0.522080000000 |
| H | 3.503020000000  | 2.991500000000  | -1.722140000000 |
| H | -3.999010000000 | 2.824520000000  | 5.844410000000  |
| H | -4.267880000000 | 4.365950000000  | 5.761030000000  |
| H | -2.797400000000 | 3.823620000000  | 5.712080000000  |
| H | 2.090630000000  | 2.965280000000  | 2.454510000000  |
| H | 2.789190000000  | 3.515890000000  | 3.745210000000  |
| H | 2.183370000000  | 4.510850000000  | 2.697420000000  |
| H | 5.235070000000  | 4.056840000000  | -2.621280000000 |
| H | 6.025680000000  | 3.427570000000  | -3.819530000000 |
| H | 5.316170000000  | 2.498850000000  | -2.775370000000 |
| H | -3.467350000000 | 0.406810000000  | -0.877380000000 |
| H | -3.731310000000 | 0.117020000000  | 0.639920000000  |
| H | -4.177320000000 | -0.922100000000 | -0.445940000000 |
| H | 4.598980000000  | 2.698940000000  | -5.858910000000 |
| H | 4.771110000000  | 4.247270000000  | -5.683070000000 |
| H | 3.343260000000  | 3.635940000000  | -5.895160000000 |
| H | -0.023560000000 | 3.602820000000  | 5.648630000000  |
| H | 1.340090000000  | 4.374230000000  | 5.596060000000  |

|   |                 |                 |                 |
|---|-----------------|-----------------|-----------------|
| H | 1.324910000000  | 2.806580000000  | 5.572500000000  |
| H | -2.027840000000 | 2.675480000000  | -3.632810000000 |
| H | -2.454930000000 | 3.438610000000  | -4.934390000000 |
| H | -2.016500000000 | 4.243130000000  | -3.661820000000 |
| H | -5.219770000000 | 4.280390000000  | 2.788060000000  |
| H | -5.792250000000 | 3.624900000000  | 4.093260000000  |
| H | -5.266540000000 | 2.719640000000  | 2.925830000000  |
| H | 0.519090000000  | 3.870540000000  | -6.333860000000 |
| H | -1.010990000000 | 3.622150000000  | -6.565890000000 |
| H | -0.048830000000 | 2.409150000000  | -6.319350000000 |
| H | -3.489480000000 | 3.451030000000  | 1.631510000000  |
| H | -0.112700000000 | -4.925390000000 | -0.902760000000 |
| H | -2.005340000000 | -3.908350000000 | 1.033290000000  |
| H | -3.737390000000 | -2.843020000000 | 1.932430000000  |
| H | -4.528000000000 | -3.472280000000 | 3.130680000000  |
| H | -3.818490000000 | -4.401000000000 | 2.086520000000  |
| H | -3.101300000000 | -4.200910000000 | 5.170060000000  |
| H | -3.273430000000 | -2.652580000000 | 4.994220000000  |
| H | -1.845580000000 | -3.263910000000 | 5.206310000000  |
| H | 3.525520000000  | -4.224360000000 | 2.943960000000  |
| H | 3.952610000000  | -3.461240000000 | 4.245540000000  |
| H | 3.514180000000  | -2.656720000000 | 2.972970000000  |
| H | 0.978590000000  | -3.029310000000 | 5.645010000000  |
| H | 2.508670000000  | -3.277710000000 | 5.877040000000  |
| H | 1.546510000000  | -4.490700000000 | 5.630500000000  |

Dimeric complex 1

|    |                 |                  |                 |
|----|-----------------|------------------|-----------------|
| Gd | -0.003687000000 | 0.001315000000   | -0.005878000000 |
| Gd | 1.578985000000  | -6.972212000000  | -0.560177000000 |
| P  | 0.198183000000  | -3.660380000000  | 0.637489000000  |
| P  | 3.172093000000  | -3.899863000000  | -1.476728000000 |
| P  | 1.379848000000  | 3.309537000000   | -1.210353000000 |
| P  | -1.594258000000 | 3.076857000000   | 0.904350000000  |
| P  | 1.374093000000  | -10.635055000000 | -1.196012000000 |
| O  | 0.148359000000  | -2.432148000000  | -0.204778000000 |
| O  | 0.455488000000  | -4.917107000000  | -0.111837000000 |
| O  | 3.271839000000  | -3.140449000000  | -0.225300000000 |
| O  | 3.055831000000  | -5.374080000000  | -1.381276000000 |
| O  | 2.050822000000  | -7.826635000000  | -2.846382000000 |
| O  | 2.759348000000  | -6.165794000000  | 1.542871000000  |
| O  | -0.750471000000 | -7.565109000000  | -0.518228000000 |
| O  | 1.033820000000  | -7.404464000000  | 1.828334000000  |
| O  | 0.558701000000  | -6.312962000000  | -2.781298000000 |
| O  | 3.821585000000  | -7.976833000000  | -0.387773000000 |
| O  | 2.149766000000  | -6.686408000000  | 3.542771000000  |
| O  | 1.198457000000  | -7.118399000000  | -4.690002000000 |

|   |                 |                  |                 |
|---|-----------------|------------------|-----------------|
| O | 1.424931000000  | -9.405134000000  | -0.356273000000 |
| O | 1.121505000000  | 2.054566000000   | -0.458443000000 |
| O | -1.479213000000 | 1.602351000000   | 0.811931000000  |
| O | -0.476227000000 | -0.848013000000  | 2.282079000000  |
| O | -1.183386000000 | 0.804380000000   | -2.110581000000 |
| O | 2.325280000000  | -0.593589000000  | -0.046605000000 |
| O | 0.541120000000  | -0.436298000000  | -2.393495000000 |
| O | 1.017143000000  | 0.664290000000   | 2.213883000000  |
| O | -2.247115000000 | -1.001807000000  | -0.176218000000 |
| O | 1.430686000000  | 4.539457000000   | -0.370614000000 |
| O | -1.693378000000 | 3.833777000000   | -0.348638000000 |
| O | -0.574235000000 | 0.279151000000   | -4.109406000000 |
| O | 0.376724000000  | -0.136690000000  | 4.124240000000  |
| O | 1.115751000000  | -11.890026000000 | -0.444101000000 |
| N | 1.949420000000  | -3.269048000000  | -2.411587000000 |
| N | 1.329688000000  | -3.468004000000  | 1.846857000000  |
| N | -1.179990000000 | -3.794952000000  | 1.569216000000  |
| N | 1.986592000000  | -6.764272000000  | 2.340712000000  |
| N | 4.452890000000  | -3.528152000000  | -2.505257000000 |
| N | 1.273856000000  | -7.078130000000  | -3.469760000000 |
| N | -0.140092000000 | -3.636999000000  | 3.710941000000  |
| N | 3.115376000000  | -3.563086000000  | -4.468164000000 |
| N | 0.815076000000  | -3.391969000000  | -4.425294000000 |
| N | -2.424407000000 | -3.583271000000  | 3.512135000000  |
| N | 5.383411000000  | -3.374531000000  | -4.619557000000 |
| N | 2.136986000000  | -3.505164000000  | 4.002975000000  |
| N | 0.248501000000  | 3.500358000000   | -2.420115000000 |
| N | 2.757908000000  | 3.171911000000   | -2.141800000000 |
| N | -0.371063000000 | 3.708584000000   | 1.837910000000  |
| N | -2.874747000000 | 3.451739000000   | 1.932112000000  |
| N | 0.301358000000  | -0.098869000000  | 2.903917000000  |
| N | -0.411125000000 | 0.203625000000   | -2.907189000000 |
| N | 1.718138000000  | 3.326316000000   | -4.283845000000 |
| N | -1.537261000000 | 3.419739000000   | 3.895086000000  |
| N | 0.763180000000  | 3.588870000000   | 3.851867000000  |
| N | 4.002497000000  | 3.378568000000   | -4.085148000000 |
| N | -0.558830000000 | 3.459429000000   | -4.576153000000 |
| N | -3.805139000000 | 3.610477000000   | 4.046091000000  |
| N | 0.242746000000  | -10.444233000000 | -2.405773000000 |
| N | 2.752153000000  | -10.772680000000 | -2.127458000000 |
| N | 1.712384000000  | -10.618275000000 | -4.269504000000 |
| N | 3.996743000000  | -10.566024000000 | -4.070807000000 |
| N | -0.564584000000 | -10.485162000000 | -4.561812000000 |
| C | 1.083287000000  | -3.547402000000  | 3.187495000000  |
| C | 1.953775000000  | -3.428029000000  | -3.778111000000 |
| C | 4.277742000000  | -3.483452000000  | -3.855861000000 |

|   |                 |                  |                 |
|---|-----------------|------------------|-----------------|
| C | -1.211558000000 | -3.659677000000  | 2.924718000000  |
| C | 5.257116000000  | -3.254657000000  | -6.074566000000 |
| C | -3.648040000000 | -3.612833000000  | 2.751263000000  |
| C | -0.480083000000 | -3.372608000000  | -3.746381000000 |
| C | -2.507581000000 | -3.432538000000  | 4.962784000000  |
| C | 3.500697000000  | -3.443461000000  | 3.531135000000  |
| C | 5.089221000000  | -7.333065000000  | -0.338275000000 |
| C | 6.724526000000  | -3.352186000000  | -4.048976000000 |
| C | 1.934661000000  | -3.652809000000  | 5.440869000000  |
| C | 0.766905000000  | -3.463161000000  | -5.872622000000 |
| C | -0.375549000000 | 3.552418000000   | 3.204759000000  |
| C | 0.494835000000  | 3.417999000000   | -3.760586000000 |
| C | 2.789586000000  | 3.304372000000   | -3.497576000000 |
| C | -3.514219000000 | -0.357096000000  | -0.227041000000 |
| C | -2.699562000000 | 3.499073000000   | 3.282620000000  |
| C | 2.058354000000  | 3.605765000000   | 3.172916000000  |
| C | 0.811293000000  | 3.520615000000   | 5.299339000000  |
| C | 5.226105000000  | 3.349561000000   | -3.324217000000 |
| C | 4.085793000000  | 3.526248000000   | -5.536104000000 |
| C | -3.678744000000 | 3.733239000000   | 5.500850000000  |
| C | -5.146236000000 | 3.632755000000   | 3.475463000000  |
| C | -1.922489000000 | 3.523228000000   | -4.104441000000 |
| C | -0.356628000000 | 3.308660000000   | -6.013739000000 |
| C | 0.489081000000  | -10.526592000000 | -3.746245000000 |
| C | 2.783832000000  | -10.640220000000 | -3.483235000000 |
| C | 5.220351000000  | -10.595030000000 | -3.309876000000 |
| C | 4.080039000000  | -10.418343000000 | -5.521763000000 |
| C | -1.928243000000 | -10.421363000000 | -4.090099000000 |
| C | -0.362382000000 | -10.635931000000 | -5.999398000000 |
| H | 3.921208000000  | -5.866697000000  | -1.420057000000 |
| H | -1.263384000000 | -7.050237000000  | -1.176229000000 |
| H | -1.235234000000 | -7.459476000000  | 0.327952000000  |
| H | 2.313768000000  | -3.423455000000  | 1.540491000000  |
| H | 3.858461000000  | -8.830670000000  | -0.906448000000 |
| H | 5.362730000000  | -3.257146000000  | -2.118911000000 |
| H | 4.839135000000  | -4.182457000000  | -6.515081000000 |
| H | 6.255294000000  | -3.061910000000  | -6.503593000000 |
| H | 4.582222000000  | -2.419509000000  | -6.345008000000 |
| H | -4.136707000000 | -2.610761000000  | 2.714267000000  |
| H | -4.374505000000 | -4.318086000000  | 3.207443000000  |
| H | -3.427186000000 | -3.945577000000  | 1.722354000000  |
| H | -0.363339000000 | -3.735913000000  | -2.713492000000 |
| H | -1.170122000000 | -4.048136000000  | -4.288855000000 |
| H | -0.902355000000 | -2.347355000000  | -3.759290000000 |
| H | -2.199929000000 | -4.359773000000  | 5.490052000000  |
| H | -3.553927000000 | -3.203465000000  | 5.237441000000  |

|   |                |                |                |
|---|----------------|----------------|----------------|
| H | -1.85476000000 | -2.60852800000 | 5.30934500000  |
| H | 3.81638200000  | -4.40141500000 | 3.06464800000  |
| H | 4.16448300000  | -3.24380000000 | 4.39118700000  |
| H | 3.65291500000  | -2.61445600000 | 2.80725300000  |
| H | 5.35085800000  | -6.83130400000 | -1.31009200000 |
| H | 5.91080500000  | -8.05016200000 | -0.13732000000 |
| H | 5.05965300000  | -6.59929600000 | 0.48986000000  |
| H | 6.99776600000  | -2.35849600000 | -3.62585600000 |
| H | 7.46220500000  | -3.58955000000 | -4.83561800000 |
| H | 6.84489800000  | -4.12253300000 | -3.25771700000 |
| H | 0.85467900000  | -3.64520200000 | 5.65203200000  |
| H | 2.42531300000  | -2.81520200000 | 5.97732800000  |
| H | 2.37013200000  | -4.61195100000 | 5.79120100000  |
| H | 0.11778000000  | -2.65495700000 | -6.26706000000 |
| H | 0.35401300000  | -4.44398200000 | -6.18978500000 |
| H | 1.78228200000  | -3.35323500000 | -6.28451100000 |
| H | 0.68582100000  | -2.59316100000 | -1.11843500000 |
| H | 0.86898400000  | 4.45862200000  | 0.47711900000  |
| H | -1.84213400000 | 1.10384700000  | 1.58585300000  |
| H | 2.87853300000  | 0.16138900000  | -0.33526100000 |
| H | 2.83881900000  | -1.43613400000 | -0.18222200000 |
| H | -0.72456900000 | 3.62499500000  | -2.09572900000 |
| H | -2.30021900000 | -1.84781800000 | 0.33637100000  |
| H | -3.78361700000 | 3.70991600000  | 1.53629300000  |
| H | -3.20283600000 | 2.83148900000  | 5.93642500000  |
| H | -4.68448900000 | 3.86513300000  | 5.93555900000  |
| H | -3.05317500000 | 4.60581000000  | 5.77487100000  |
| H | 4.96692900000  | 3.31422700000  | -2.25146000000 |
| H | 5.84017000000  | 4.25458600000  | -3.52797600000 |
| H | 5.84304000000  | 2.45993300000  | -3.59018600000 |
| H | 1.94109200000  | 3.22634600000  | 2.14490300000  |
| H | 2.75912200000  | 2.95243700000  | 3.72801400000  |
| H | 2.47833400000  | 4.63405900000  | 3.14221200000  |
| H | 3.07992300000  | 3.42080300000  | -5.96892700000 |
| H | 4.75932000000  | 2.75201300000  | -5.96631500000 |
| H | 4.50153100000  | 4.52152900000  | -5.80998300000 |
| H | -2.25216000000 | 2.56007500000  | -3.65828100000 |
| H | -2.58334600000 | 3.75528200000  | -4.95896700000 |
| H | -2.06567500000 | 4.33108300000  | -3.35551600000 |
| H | -3.82407300000 | 0.04495000000  | 0.76402800000  |
| H | -4.30181700000 | -1.05591700000 | -0.57674100000 |
| H | -3.43164200000 | 0.46946900000  | -0.95602900000 |
| H | -5.41305300000 | 4.62036400000  | 3.03418800000  |
| H | -5.88526600000 | 3.41439900000  | 4.26631100000  |
| H | -5.26975600000 | 2.85259300000  | 2.69383700000  |
| H | 0.69242600000  | 3.53814400000  | -6.25757700000 |

|   |                 |                  |                 |
|---|-----------------|------------------|-----------------|
| H | -1.025751000000 | 4.004997000000   | -6.557617000000 |
| H | -0.580847000000 | 2.269649000000   | -6.339379000000 |
| H | 1.470848000000  | 4.319099000000   | 5.698471000000  |
| H | 1.214284000000  | 2.536856000000   | 5.622290000000  |
| H | -0.203101000000 | 3.642365000000   | 5.711617000000  |
| H | 1.255046000000  | -9.626716000000  | 0.594817000000  |
| H | -0.735881000000 | -10.574767000000 | -2.126102000000 |
| H | 5.662953000000  | -9.575404000000  | -3.189778000000 |
| H | 5.976807000000  | -11.226875000000 | -3.818727000000 |
| H | 5.017047000000  | -11.021696000000 | -2.311543000000 |
| H | 3.826324000000  | -11.362326000000 | -6.049436000000 |
| H | 5.114756000000  | -10.136670000000 | -5.793325000000 |
| H | 3.388123000000  | -9.630781000000  | -5.876477000000 |
| H | -2.260926000000 | -11.364543000000 | -3.597924000000 |
| H | -2.598694000000 | -10.249059000000 | -4.951143000000 |
| H | -2.085501000000 | -9.577106000000  | -3.383289000000 |
| H | 0.719417000000  | -10.678468000000 | -6.199190000000 |
| H | -0.806976000000 | -9.773826000000  | -6.538571000000 |
| H | -0.840209000000 | -11.569417000000 | -6.365327000000 |

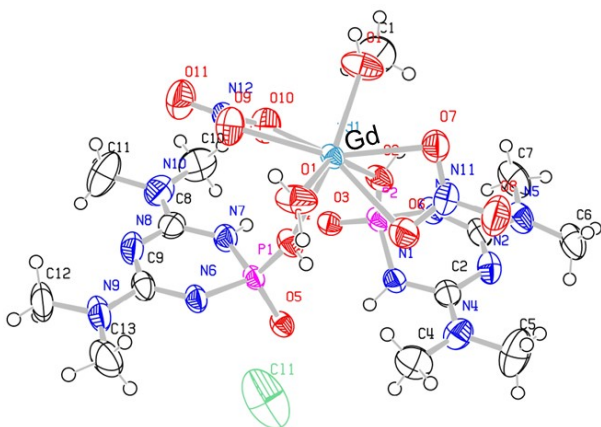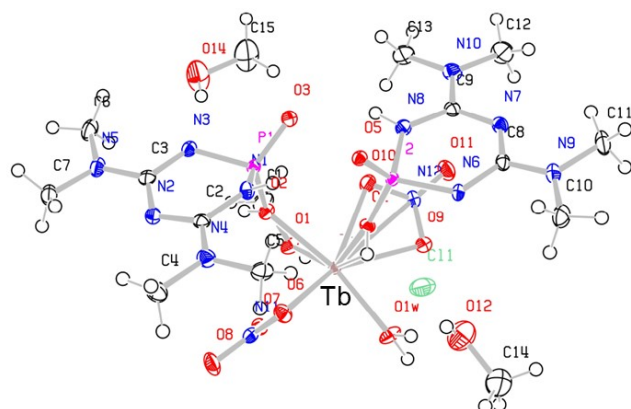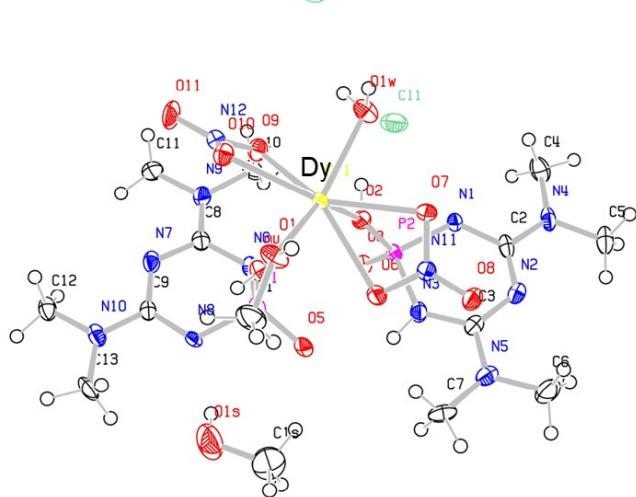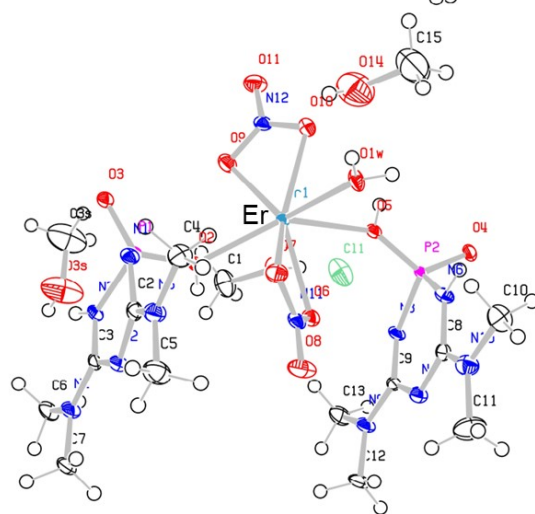

**Figure S15.** ORTEP diagrams drawn (using ORTEP-3 software<sup>2</sup>) for complexes **1-4** at 50% thermal ellipsoid probability.

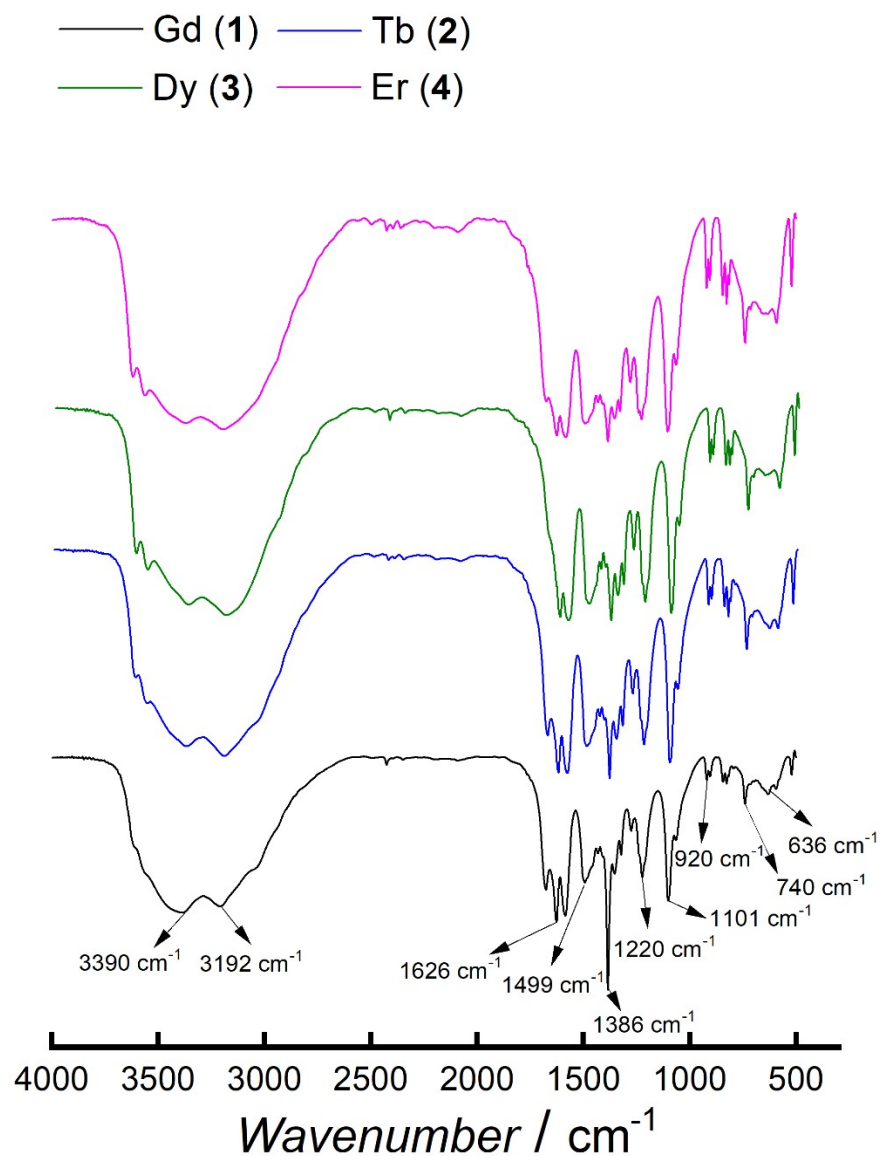

**Figure S16.** FTIR spectra of complexes **1-4**. The characteristic bands are listed in main text.

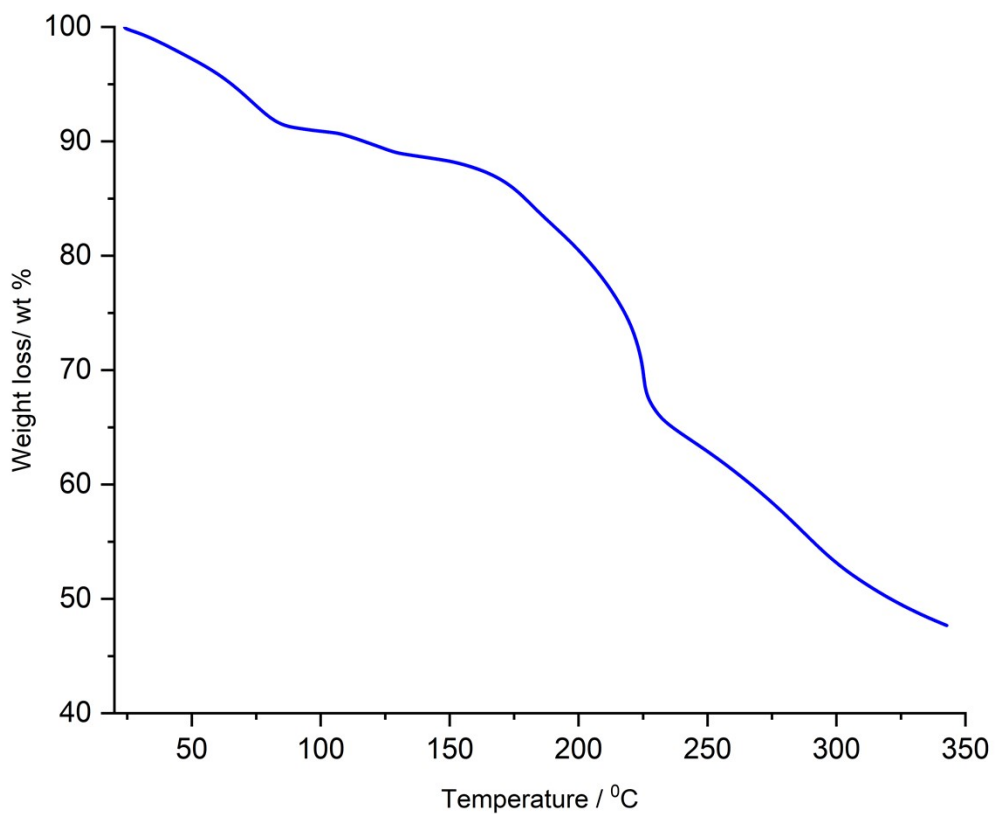

**Figure S17.** Thermogravimetric analysis (TGA) of **3**.

The thermal gravimetric analysis (TGA) data indicates that when the temperature reaches 70°C, the sample experiences a weight loss of around 8.5%, equivalent to the departure of two methanol molecules from the crystal lattice. While one of these methanol molecules has been accounted for in the updated cif (Crystallographic Information File), the other molecule was masked due to its significant disorder.



## References

1. V. Chandrasekhar, T. Senapati, A. Dey, S. Das, M. Kalisz and R. Clérac, Cyclo- and Carbophosphazene-Supported Ligands for the Assembly of Heterometallic ( $\text{Cu}^{2+}/\text{Ca}^{2+}$ ,  $\text{Cu}^{2+}/\text{Dy}^{3+}$ ,  $\text{Cu}^{2+}/\text{Tb}^{3+}$ ) Complexes: Synthesis, Structure, and Magnetism, *Inorg. Chem.*, 2012, **51**, 2031-2038.
2. L. J. Farrugia, WinGX and ORTEP for Windows: an update *J. Appl. Cryst.* (2012), 45, 849-854.
